# Supplementary material for: Depressive symptoms and the general health of retired professional footballers compared with the general population in the UK: a case–control study
Source: PubMed Central journal article supplement — BMJ Open. 2019 Sep 8;9(9):e030056. doi: 10.1136/bmjopen-2019-030056 (PMC6738669; doi:10.1136/bmjopen-2019-030056), 2019-09-08
Supplement: bmjopen-2019-030056.draft_revisions.pdf [file bmjopen-2019-030056.draft_revisions.pdf]

# BMJ Open

BMJ Open is committed to open peer review. As part of this commitment we make the peer review history of every article we publish publicly available.

When an article is published we post the peer reviewers' comments and the authors' responses online. We also post the versions of the paper that were used during peer review. These are the versions that the peer review comments apply to.

The versions of the paper that follow are the versions that were submitted during the peer review process. They are not the versions of record or the final published versions. They should not be cited or distributed as the published version of this manuscript.

BMJ Open is an open access journal and the full, final, typeset and author-corrected version of record of the manuscript is available on our site with no access controls, subscription charges or pay-per-view fees (<http://bmjopen.bmj.com>).

If you have any questions on BMJ Open's open peer review process please email [info.bmjopen@bmj.com](mailto:info.bmjopen@bmj.com)

# BMJ Open

## Depression and the General Health of Retired Professional Footballers compared to the General Population: A Case Control Study

|                               |                                                                                                                                                                                                                                                                                                                                                                                                                                                                                                                                                                                                     |
|-------------------------------|-----------------------------------------------------------------------------------------------------------------------------------------------------------------------------------------------------------------------------------------------------------------------------------------------------------------------------------------------------------------------------------------------------------------------------------------------------------------------------------------------------------------------------------------------------------------------------------------------------|
| Journal:                      | <i>BMJ Open</i>                                                                                                                                                                                                                                                                                                                                                                                                                                                                                                                                                                                     |
| Manuscript ID                 | bmjopen-2019-030056                                                                                                                                                                                                                                                                                                                                                                                                                                                                                                                                                                                 |
| Article Type:                 | Research                                                                                                                                                                                                                                                                                                                                                                                                                                                                                                                                                                                            |
| Date Submitted by the Author: | 25-Feb-2019                                                                                                                                                                                                                                                                                                                                                                                                                                                                                                                                                                                         |
| Complete List of Authors:     | Fernandes, Gwen; University of Nottingham, Rheumatology, Orthopaedics and Dermatology<br>Parekh, Sanjay; University of Nottingham, Academic Rheumatology<br>Moses, Jonathan; University of Nottingham, Academic Rheumatology<br>Fuller, Colin; Colin Fuller Consultancy Ltd<br>Scammell, Brigitte; University of Nottingham, Rheumatology, Orthopaedics and Dermatology<br>Batt, Mark ; University of Nottingham, Rheumatology, Orthopaedics and Dermatology<br>Zhang, Weiya; University of Nottingham, Academic Rheumatology<br>Doherty, Michael ; University of Nottingham, Academic Rheumatology |
| Keywords:                     | professional football, Depression & mood disorders < PSYCHIATRY, Anxiety disorders < PSYCHIATRY, pain                                                                                                                                                                                                                                                                                                                                                                                                                                                                                               |
|                               |                                                                                                                                                                                                                                                                                                                                                                                                                                                                                                                                                                                                     |

SCHOLARONE™  
Manuscripts

## Depression and the General Health of Retired Professional Footballers compared to the General Population: A Case Control Study

Gwen Sascha Fernandes, research fellow<sup>1,2,3</sup>, Sanjay Parekh, doctoral student <sup>1,2</sup>, Jonathan Moses, foundation doctor<sup>1,2,5</sup>, Colin Fuller, risk management consultant<sup>2,4</sup>, Brigitte Scammell, professor of orthopaedics<sup>1,2,3,5</sup>, Mark Edward Batt, professor of sports and exercise medicine<sup>1,2,5</sup>, Weiya Zhang, professor of epidemiology<sup>1,2,3</sup>, Michael Doherty, professor of rheumatology<sup>1,2,3</sup>

1: Division of Rheumatology, Orthopaedics and Dermatology (School of Medicine, University of Nottingham), Academic Rheumatology, Nottingham City Hospital, NG5 1PB

2: Arthritis Research UK Centre for Sports, Exercise and Osteoarthritis, Queens Medical Centre, Derby Road, NG7 2UH

3: Arthritis Research UK Pain Centre, Nottingham City Hospital, NG5 1PB

4: Colin Fuller Consultancy Ltd, Sutton Bonnington, LE12 6PF

5: Nottingham University Hospitals NHS Trust, Queens Medical Centre, Derby Road, NG7 2UH

Correspondence to: Professor Weiya Zhang

Address: Academic Rheumatology, Clinical Sciences Building, Nottingham City Hospital, University of Nottingham, NG5 1PB.

Tel: 01158231756

Email: [weiya.zhang@nottingham.ac.uk](mailto:weiya.zhang@nottingham.ac.uk)

Manuscript Word Count: 3330 words

## Abstract

**Objectives:** To determine the prevalence of depression and general health of male ex-professional footballers compared to general population controls.

**Methods:** 572 retired professional footballers and 500 general population controls in the UK were assessed by postal questionnaire. Anxiety and depression were defined using the Hospital Anxiety and Depression Scale (HADS) with an optimal cut-off score for each being >11. General health was ascertained using: the SF-12 quality of life tool; self-reported comorbidities, analgesic usage and body pain; and index of multiple deprivation (IMD) based on postcode data. Mood was assessed using the positive and negative affect scale (PANAS) and sleep using the Medical Outcome Survey (MOS). Linear regression analysis was used to determine relative risk (aRR) with 95% confidence intervals (CI) and adjusted for age, body mass index (BMI), comorbidities, body pain and medication usage.

**Results:** Depression prevalence in retired professional footballers was 5.66% compared to 5.76% in the general population and anxiety prevalence was also comparable (12.01% vs. 10.29%; all  $p>0.05$ ). However, footballers had lower physical and mental component scores compared to controls ( $p<0.01$ ). They also reported significantly more sleep problems, more negative mood profiles and more widespread body pain (aRR 1.88, 95% CI 1.15 - 3.09). They also reported greater pain medication usage compared with controls (aRR 1.54, 95% CI 1.26 - 1.89). However, compared to controls they were 26% (95% CI, 15% - 37%) less likely to report comorbidities, especially heart attacks (57%, 95% CI 27% - 74%) and diabetes (61%, (95% CI 37% - 76%).

**Conclusions:** The prevalence of depression and anxiety in ex-professional footballers is comparable to general population controls. However, ex-footballers reported lower health-related quality of life, more widespread body pain and higher analgesic usage. Conversely lower reporting of diabetes and heart attacks indicate potential long-term physical health benefits from professional football.

### Strengths:

- Largest study of depression and general health in ex-professional footballers and controls in the UK
- Case-control study design with control male participants recruited from a community-based population sample representative of the UK general population
- Depression and anxiety assessed using the validated Hospital Anxiety and Depression Scale in both ex-footballers and control men.

### Limitations:

- Outcomes were self-reported by participants using postal questionnaires
- Lack of current or previous physical activity levels assessed
- Higher response rate in the ex-footballers compared to the control participants.

1  
2  
3  
4  
5  
6  
7  
8  
9  
10  
11  
12  
13  
14  
15  
16  
17  
18  
19  
20  
21  
22  
23  
24  
25  
26  
27  
28  
29  
30  
31  
32  
33  
34  
35  
36  
37  
38  
39  
40  
41  
42  
43  
44  
45  
46  
47  
48  
49  
50  
51  
52  
53  
54  
55  
56  
57  
58  
59  
60  

Keywords:

*Professional football, epidemiology, depression, anxiety, sleep, pain, cardiovascular health*

Key Messages:

Footballers have poorer quality of life with lower physical and mental component scores but do not experience more depression or anxiety compared to controls.

They report more widespread body pain, more use of analgesics (particularly NSAIDs and OTC analgesics) and have poorer sleep quality (restlessness, shortness of breath and drowsiness).

Although they report worse musculoskeletal health, they report better general systemic health (less heart disease and diabetes) compared with controls.

peer review only

## Introduction

Football is the world's most popular sport with over 300 million active players worldwide and 110,000 athletes registered at a professional level<sup>1</sup>. There has been considerable interest in whether the mental health of athletes is often compromised, especially by anxiety and depression<sup>2</sup>. Retired professional footballers may experience unique psychological stress factors primarily due to the nature and the intensity of the sport where severe or recurrent injuries are common<sup>3</sup> and the pressures of competition, training and maintaining high-performance levels are hallmarks of a successful professional career<sup>4</sup>. The intensity of mental and physical demands may increase their susceptibility to certain mental health problems and risk-taking behaviour.

Despite individual high-profile cases of depression in the United Kingdom (e.g. Gary Speed, Paul Gascoigne, Clarke Carlisle), there is a lack of robust epidemiological studies on mental health issues in professional footballers. Studies on European former professional footballers from countries such as the Netherlands have reported anxiety and depression prevalence figures ranging from 25-43%<sup>5</sup>. However, none of these studies included a non-athlete or general population comparison group. A recent systematic review suggests that despite a seemingly higher risk of anxiety and depression in athletes in a range of elite sport, the figures are broadly comparable to the general population. The review further concluded that the evidence base is restricted by a paucity of high-quality study designs particularly in professional footballers<sup>6</sup>. Turner et al.<sup>7</sup> also found that anxiety and depression featured in 37% of former players with knee pain and knee osteoarthritis. A subsequent phenomenological study<sup>8</sup> suggested that these may be common sequelae of significant sport injuries that caused frustration and associated participation restrictions and limitations to work, social and leisure activities. Studies focused on mental health and well-being of athletes are limited by study design; lack of power and small sample sizes; and comparison across sporting populations<sup>2,9-12</sup>.

Therefore, any future studies should be focused on an individual sport such as professional football and its full-time players; powered for depression outcomes and with an age-adjusted control population; investigate any comorbidities and auxiliary

1  
2  
3 measures of mental health and well-being such as sleep patterns, mood profiles,  
4 quality of life (QoL) and pain distribution including use of pain medication.  
5  
6  
7

8 Therefore, based on previous research and the gaps in the evidence base, the  
9 objectives of the present study were to: (1) determine the prevalence of anxiety and  
10 depression in retired professional footballers compared to general population controls;  
11 (2) determine the general health in retired professional footballers compared to  
12 general population controls; and (3) determine the risk and protective factors  
13 associated with professional football.  
14  
15  
16  
17  
18  
19  
20  
21  
22  
23  
24  
25  
26  
27  
28  
29  
30  
31  
32  
33  
34  
35  
36  
37  
38  
39  
40  
41  
42  
43  
44  
45  
46  
47  
48  
49  
50  
51  
52  
53  
54  
55  
56  
57  
58  
59  
60

For peer review only

## Methods

The Nottingham Research Ethics Committee 1 (Refs 14/EM/0045 & 14/EM/0015) approved this study. A cross-sectional design was used, involving a series of postal questionnaire surveys to ex-footballers and to a sample of men in the general population (aged 40 years and over) to gain information on anxiety, depression, mood and sleep as well as well as simple demographics, occupational history, general health (comorbidities) and current medications. The exclusion criteria at baseline were known terminal illness, severe psychiatric illness or dementia, or any other condition or circumstance considered by their General Practice to make them unsuitable to receive the questionnaire.

### Participants

The recruitment of the source sample of ex-footballers and general population controls has been detailed in a previous publication examining the risk of knee pain and osteoarthritis in the footballers versus the controls<sup>13</sup>. Individuals in that study who indicated interest in further research conducted by the University of Nottingham were subsequently contacted with a follow-up questionnaire focused on mental health and well-being.

### Questionnaire Survey

The postal questionnaire was developed based on previously published questionnaires and using extensively validated tools in the retired footballers and the control population. Through public and patient involvement, pilot versions of the questionnaire were evaluated to identify any problems with content, language and layout. The questionnaires were similarly constructed to capture detailed information about all participants (including football career history for retired footballers), anthropometric details (age and body mass index (BMI)), medical history and current medication usage.

### Age and body mass index (BMI)

Participants self-reported their date of birth and height and weight in the returned questionnaires. BMI was calculated as the weight divided by the square of height (kg/m<sup>2</sup>).



### Anxiety and depression

Anxiety and depression were determined using the Hospital Anxiety and Depression Scale (HADS) which is comprised of 14 items, equally divided between the two mood states (anxiety and depression). Each item has a 4-point rating scale. Responders are asked to indicate their feelings based on the previous one week with recommended cut-off points indicating whether the responder is: a) within the normal range (scores of 0-7), b) mild-moderate caseness (scores of 8-10) and, c) severe caseness (scores of 11-21). Although cut-offs of  $> 8$  have been used in some studies to indicate anxiety or depression<sup>14</sup> this threshold is considered too low and lacking in sensitivity for use in a general population sample<sup>15</sup> so a cut-off of  $\geq 11$  was used to identify definite anxiety and definite depression.

### Quality of Life Measures

QoL was assessed using the Medical Outcome Study Short Form-36 Health Survey Questionnaire (SF-36) in the ex-footballers which was converted into SF-12 and the Medical Outcome Study Short Form-12 Health Survey Questionnaire (SF-12) in the general population controls. The difference in SF versions was due to logistical reasons as the control postal questionnaire was more challenged by length restrictions than the second follow-up questionnaire to ex-footballers. Each SF response was used to calculate scores in each of the eight domains: physical functioning; role physical; bodily pain; general health perception; vitality; social functioning; role emotional; and mental health. These figures were then standardised using z-score transformations using means and standard deviations previously described (Jenkinson 1999). Using the z scores for each scale, the aggregate score for two summary scales: the Mental Component Score (MCS) and the Physical Component Score (PCS) were calculated. Finally, the scores were standardised to a T-score where the mean was set to 50 and the standard deviation to 10. For the SF-12, scoring was conducted according to previously published data<sup>16,17</sup>. Item weights for response categories from an American population-based study, which was found comparable to other population studies in nine other countries including the United Kingdom, was used to standardise responses<sup>16</sup>. There is considerable evidence suggesting that the PCS and MCS from the SF-12 show similar levels of precision to the summary scores derived from the longer SF-36 version. Even though summary scores are not exactly

1  
2  
3 identical the level of difference between the two is small and is not subjectively or  
4 clinically meaningful<sup>18</sup>.  
5  
6  
7

### 8 Medical Outcome Survey (MOS) Sleep Scale 9

10 The sleep scale from MOS is a 12-item measure that is generic and not disease  
11 specific and measures 6 dimensions of sleep: sleep disturbance, snoring, shortness  
12 of breath with headache, sleep adequacy, somnolence and quantity of sleep<sup>19</sup>. The  
13 tool has demonstrated excellent reliability and validity for assessing sleep in  
14 community samples<sup>20,21</sup>. A sleep problems index (SLP-9) can be calculated using nine  
15 items from the MOS Sleep scale indicating quality of sleep on a 0-100 scale. The  
16 higher the score, the lower the quality of sleep. The quantity of sleep is recorded as  
17 the average hours of sleep per night over the previous 4-week period and was  
18 dichotomised as optimal sleep (if this was 7-8 hours) or non-optimal if this was less  
19 than 7 hours or greater than 8 hours as per MOS sleep scoring criteria.  
20  
21  
22  
23  
24  
25  
26  
27  
28

### 29 Positive and Negative Affect Scale (PANAS) 30

31 PANAS is a self-report questionnaire comprising two 10-item scales, which describe  
32 different feelings and emotions measuring both positive and negative affect<sup>22</sup>. The  
33 questionnaire asked responders to consider their feelings at the time of completing the  
34 questionnaire. The normal population reference guides for mean positive affect score  
35 is 29.7 (+ 7.9) and mean negative affect score is 14.8 (+ 5.4). PANAS has  
36 demonstrated high reliability and construct validity, is brief and ideal for use in self-  
37 reported questionnaires and has been used extensively alongside measures of anxiety  
38 and depression such as HADS<sup>23,24</sup>.  
39  
40  
41  
42  
43  
44  
45  
46

### 47 Indices of Multiple Deprivation 48

49 The Index of Multiple Deprivations (IMD) is an official measure of the relative  
50 deprivation in England<sup>25</sup>. It ranks all areas in England from 1 (most deprived) to 32,844  
51 (least deprived area) and is based on weights given to key domains such as income,  
52 employment, education and housing. It uses postcodes to determine an overall  
53 measure of deprivation. This information was then presented in quintiles with  
54 percentage of footballers and controls within the lowest and highest quintiles.  
55  
56  
57  
58  
59  
60

### Comorbidities

1  
2  
3 Individual comorbidities were self-reported according to a brief specific checklist  
4 enquiry (fibromyalgia, diabetes, heart attacks, hypertension, cancer), with data  
5 dichotomised into individuals with or without these conditions. An open text question  
6 was also included to capture information on any other diagnosed medical conditions  
7 not on the checklist<sup>26</sup>.  
8  
9

### 13 Widespread Body Pain

15 Widespread body pain was self-reported using a body pain mannequin<sup>27</sup>. It was scored  
16 using the American College of Rheumatology criteria for widespread body pain whose  
17 definition is pain in each of the four quadrants of the body and including the spinal or  
18 axial column. Reported pain in any part of the body was dichotomous (present/absent)  
19 and total number of regions with pain was a simple count of the shaded regions of the  
20 manikin.  
21  
22  
23  
24  
25

### 27 Pain-relieving Medication

29 Self-reported analgesic medication (both prescribed and over the counter) was  
30 recorded and grouped as all pain-relieving medication, and sub-grouped as anti-  
31 inflammatory drugs (NSAIDs), opioids, other over the counter (OTC) and prescribed  
32 analgesics, and other medications with pain-modifying properties (e.g. citalopram and  
33 amitriptyline).  
34  
35  
36  
37  
38

### 39 Statistical Analyses

41 A power calculation was conducted based on a 12.6% prevalence of depression in a  
42 non-clinical sample of community-derived adults using the HADS<sup>15</sup> and an odds ratio  
43 (OR) of 2 after adjustment for other known factors in ex-footballers. The sample size  
44 required to detect this OR, with 90% power and a 0.05% significance level, was 336  
45 participants per group.  
46  
47  
48

49 Categorical variables were reported as frequencies and percentages, and continuous  
50 variables as mean and standard deviations (SD). To determine whether distributions  
51 of the variables were statistically significant between ex-footballers and controls a t-  
52 test (continuous variables) or chi-square test (categorical variables) was used. For the  
53 SF-12 outcomes, specifically the physical component score and mental component  
54 score between footballers and controls, we used the ranksum command in Stata,  
55 which compared two independent samples using the Mann-Whitney two-sample  
56  
57  
58  
59  
60

1  
2  
3 statistic. Statistical significance was defined as  $p < 0.05$ . We had very few missing  
4 data at random (e.g, where BMI was not reported by a participant). Imputation or  
5 modelling was therefore not undertaken for the occasional missing values. Details on  
6 missing data have previously been published<sup>13</sup>.  
7  
8  
9

10  
11 All analyses were conducted using Stata IC Version 14 on Windows 7 Operating  
12 System and power calculations were undertaken using OpenEpi Version 3.  
13  
14  
15  
16  
17  
18  
19  
20  
21  
22  
23  
24  
25  
26  
27  
28  
29  
30  
31  
32  
33  
34  
35  
36  
37  
38  
39  
40  
41  
42  
43  
44  
45  
46  
47  
48  
49  
50  
51  
52  
53  
54  
55  
56  
57  
58  
59  
60

For peer review only

## Results

Of the 898 questionnaires sent to the retired professional footballers, 572 responses were received (63.7% response). Of 2215 questionnaires sent to general population controls, 500 questionnaires were received (22.6% response) (Figure 1).

Figure 1. Selection of ex-footballer and general population controls.

The mean age of the ex-footballers was significantly younger than the controls (60 versus 64 years)) but mean BMI were comparable (Table 1).

*Table 1. Characteristics of footballer and control populations.*

|                                                                                 | Footballers<br>n=572     | Controls<br>n=500         | p-value        |
|---------------------------------------------------------------------------------|--------------------------|---------------------------|----------------|
| Age (years), mean (SD)                                                          | 60.11 (10.77)            | 64.26 (9.37)              | <0.001         |
| BMI (kg/m <sup>2</sup> ), mean (SD)                                             | 27.13 (3.40)             | 27.29 (4.48)              | 0.51           |
| Anxiety (cases), n (%)                                                          | 70 (12.01)               | 50 (10.29)                | 0.34           |
| Depression (cases), n (%)                                                       | 33 (5.66)                | 28 (5.76)                 | 0.94           |
| SF Physical Component Score, mean (SD)                                          | 45.33 (10.32)            | 77.60 (8.35)              | <0.001         |
| SF Mental Component Score, mean (SD)                                            | 48.09 (7.47)             | 71.87 (6.64)              | <0.001         |
| Optimal sleep (7-8 hours per night), n (%)                                      | 369 (64.51)              | 275 (56.70)               | 0.01           |
| Sleep Problem Index, n (%) in highest tertile of SIP                            | 186 (33.04)              | 131 (26.90)               | 0.03           |
| Positive Mood, mean (SD)                                                        | 34.75 (8.05)             | 34.97 (6.86)              | 0.63           |
| Negative Mood, mean (SD)                                                        | 16.5 (6.72)              | 14.22 (4.95)              | <0.001         |
| Indices of Multiple Deprivation (IMD) n, (%) in the lowest and highest quintile | 17 (3.51)<br>205 (42.27) | 84 (17.28)<br>199 (40.95) | <0.001<br>0.18 |

1  
2  
3 The prevalence of depression was similar in the footballers and controls (5.7% versus  
4 5.8%) but the prevalence of anxiety was slightly higher in the footballers (12.0% versus  
5 10.3%) though this was not statistically significant. Although footballers and controls  
6 shared a similar positive mood profile, footballers were significantly more likely to  
7 experience negative moods compared to the controls and to have greater problems  
8 with sleep quality ( $p<0.05$ ). When using the sleep problem index, more footballers  
9 reported problems with sleep quality ( $p<0.05$ ) and poor sleep patterns which included  
10 restlessness, shortness of breath and drowsiness. They were also more likely to have  
11 lower scores in terms of both their physical and mental health as indicated by the SF-  
12 12 QoL measure.  
13  
14  
15  
16  
17  
18  
19  
20  
21

22 With respect to social deprivation, fewer footballers (3.51%) were living in areas  
23 marked as the most deprived compared to the control population (17.28%;  $p<0.001$ ).  
24  
25  
26

27 Risk factors associated with professional football following adjustment for age and BMI  
28 are presented in Table 2. Ex-footballers overall were less likely to present with any  
29 comorbidity (diabetes, hypertension, myocardial infarction, cancer and fibromyalgia),  
30 especially diabetes (61%, 95% CI, 37-76%), heart attacks (57%, 95% CI 27-74%) and  
31 hypertension (21%, 95% CI 4-35%). However, footballers reported more widespread  
32 body pain using the ACR criteria (88%, 95% CI 15-30.9%). Footballers also  
33 consumed more NSAIDs (8.6% vs. 4.2%) and OTC analgesics (24% vs. 14%) but not  
34 opioids (4% vs. 6.4%) compared to the controls.  
35  
36  
37  
38  
39  
40  
41  
42  
43  
44  
45  
46  
47  
48  
49  
50  
51  
52  
53  
54  
55  
56  
57  
58  
59  
60

*Table 2. Comparison of self-reported comorbidities, pain and medication in the ex-footballers compared to general population controls*

|                                                                                     | Footballers<br>572 | Controls<br>500 | p-value | Adjusted relative risk<br>(95% CI)<br>(for age and bmi) |
|-------------------------------------------------------------------------------------|--------------------|-----------------|---------|---------------------------------------------------------|
| Comorbidities*<br>n (%)                                                             | 178 (30.58)        | 260 (52.31)     | <0.001  | 0.74 (0.63-0.85)+                                       |
| Comorbidities** n (%)<br>(by Charlson Comorbidity<br>Index weighting** mean<br>(SD) | 0.44 (0.80)        | 0.75 (0.98)     | <0.001  | 0.71 (0.6-0.85)+                                        |
| Diabetes, n (%)                                                                     | 22 (3.77)          | 57 (11.47)      | <0.001  | 0.39 (0.24-0.63)+                                       |
| Cancer, n (%)                                                                       | 40 (6.86)          | 50 (8.58)       | 0.07    | 0.88 (0.59-1.30)                                        |
| Heart Attacks, n (%)                                                                | 18 (3.08)          | 47 (9.46)       | <0.001  | 0.43 (0.26-0.73)+                                       |
| Hypertension, n (%)                                                                 | 134 (22.98)        | 169 (34.00)     | <0.001  | 0.79 (0.65-0.96)+                                       |
| Fibromyalgia, n (%)                                                                 | 3 (0.51)           | 1 (0.20)        | 0.39    | 3.08 (0.31-31.02)                                       |
| Any Body Pain, n (%)                                                                | 454 (78.14)        | 330 (71.90)     | 0.02    | 1.09 (1.00-1.17)~                                       |
| ACR Criteria                                                                        |                    |                 |         |                                                         |
| Widespread Body Pain<br>(no KP), n (%)                                              | 48 (8.40)          | 23 (4.60)       | 0.01    | 1.88 (1.15-3.09)~                                       |
| Total Regions with<br>Pain, mean (SD)                                               | 3.13 (3.29)        | 3.44 (3.05)     | 0.14    | 0.91 (0.79-1.05)                                        |
| Back pain, n (%)                                                                    | 176 (30.18)        | 146 (29.38)     | 0.57    | 1.00 (0.76-1.32)                                        |
| Knee pain, n (%)                                                                    | 337 (57.80)        | 193 (38.83)     | <0.001  | 1.47 (1.29-1.69)~                                       |
| Pain Medication Use, n<br>(%)                                                       | 240 (41.17)        | 165 (33.20)     | 0.007   | 1.54 (1.26-1.89)~                                       |
| Opioids, n (%)                                                                      | 23 (4.03)          | 32 (6.40)       | 0.07    | 0.64 (0.37-1.10)                                        |
| NSAIDS, n (%)                                                                       | 49 (8.58)          | 21 (4.20)       | 0.004   | 1.94 (1.19-3.20)~                                       |
| OTC Analgesics, n (%)                                                               | 137 (23.99)        | 70 (14.00)      | <0.001  | 1.86 (1.44-2.43)~                                       |
| Other medications***,<br>n (%)                                                      | 18 (3.15)          | 31 (6.20)       | 0.01    | 0.50 (0.28-0.94)+                                       |

\*Diabetes, hypertension, myocardial infarction, cancer and fibromyalgia

\*\*Includes myocardial infarction, hypertension, diabetes and cancer

\*\*\* Other medications with pain relieving effects.

+ Protective factors

~ Risk factors

## Discussion

This is the first study to report the prevalence of depression, anxiety and the general health and well-being of retired professional footballers compared to a control population. The main findings are (1) the prevalence of depression and anxiety in the ex-footballers is comparable to men in the general population; (2) ex-footballers have a lower QoL as indicated by the SF-12 physical and mental component scores; (3) they are more likely to present with widespread body pain and use pain medication particularly OTC analgesics and NSAIDs; and (4) they are less likely to present with comorbidities, in particular diabetes, heart attacks and hypertension.

The study reported a prevalence of depression (6%) and anxiety (12%) in ex-footballers which is lower than the 25-43% reported by Goutterborge<sup>5</sup>. This discrepancy could result from smaller sample sizes (range of 70-149 ex-players), sample selection and status of footballers (current professional footballers from five different European countries), and the assessment tool used to determine depression and anxiety (12-item general health questionnaire (GHQ-12)) in that study. In a further study<sup>28</sup>, specifically investigating ex-footballers, estimated a 39% prevalence of both anxiety and depression using the GHQ-12. A number of self-report assessment tools have been used in epidemiological research to detect depression and anxiety<sup>29-31</sup>. While the GHQ-12 has demonstrated excellent validity in detecting depression in the general population<sup>32</sup>, the HADS has demonstrated better sensitivity and specificity in detecting depression. Indeed, the choice of assessment tool should be balanced with feasibility of approach, cost effectiveness, as well as the administration and scoring times involved<sup>29</sup>. Additionally, none of the previous studies in ex-footballers presented results for an adequately matched comparison group of non-professional footballers. The results of this study accord with a comparative meta-analysis in high-performance athletes and non-athletes showing similar levels of depression across the groups<sup>4</sup>. Elite athletes are sometimes supported with psychological training as part of their sport programs and may have developed mental toughness and resilience in order to cope with stress, anxiety and even depression<sup>33-35</sup>. There is a noted stigma about reporting mental health symptoms both in ex-footballer and general population samples which may result in choosing to suppress, ignore and not seek further help when needed<sup>6,29,36</sup>. Furthermore, when compared to another general population study, the



1  
2  
3 prevalence of depression (7-9%) and anxiety (8-14%) in general population men aged  
4 40-65 years is comparable to the controls in this study, suggesting that this East  
5 Midlands control population are representative of the British general population and  
6 are a valid control group<sup>37</sup>.  
7  
8  
9

10  
11 In terms of QoL, the ex-footballers had significantly lower scores in both physical and  
12 mental components compared to controls. It has been postulated that this negative  
13 effect on QoL is a consequence of reporting more specific joint pain (e.g. knee pain)  
14 and more overall body pain<sup>13,38</sup>. Although both the ex-footballers and the control  
15 population indicated pain in one region on a body pain manikin (78% vs. 72%), after  
16 adjustment for age and BMI, ex-footballers are 88% more likely to present with  
17 widespread body pain when using the more stringent ACR criteria compared to the  
18 control group. Widespread pain can have significant, deleterious effects on physical  
19 and mental health and well-being<sup>39</sup> including implications on sleep disturbance and  
20 mood. Longitudinal cohort studies have shown that insomnia and sleep disturbances  
21 significantly increase the risk of chronic pain in pain-free individuals at baseline whilst  
22 pain is not a strong predictor of insomnia<sup>40</sup>. As a result of the cross-sectional nature  
23 of this study, we cannot ascertain causation between pain and sleep. However, the  
24 results in ex-footballers show that whilst sleep duration may be marginally better (64.5  
25 vs. 56.7% for 7-8 hours of sleep), the quality of sleep was more disturbed in terms of  
26 restlessness, feeling tense or drowsy compared to controls. The effect on mood is  
27 also notable with ex-footballers more likely to present with negative feelings and  
28 emotions such as distress, irritability, fear and nervousness compared to controls. The  
29 association of emotional distress and pain-related fear on patients with chronic pain  
30 has been established in previous population-based studies<sup>40-42</sup>. Widespread body pain  
31 is a key feature of fibromyalgia, but the cross-sectional nature of this study does not  
32 allow investigation of temporal trends<sup>44</sup>. A further indication of higher pain levels in ex-  
33 footballers is the significantly higher use of analgesics (41%) compared to controls  
34 (33%) and in particular NSAIDs (8.58% vs. 4.20%) and OTC analgesics (24% vs.  
35 14%). The use of analgesics presumably reflects compromised musculoskeletal  
36 health, whereas in terms of systemic general health the footballers reported  
37 significantly less diabetes, cancer, heart attacks and hypertension compared to  
38 controls. These results accord with previous studies of elite male athletes and ex-  
39 footballers with lower risk of ischaemic heart disease and diabetes, but an elevated  
40  
41  
42  
43  
44  
45  
46  
47  
48  
49  
50  
51  
52  
53  
54  
55  
56  
57  
58  
59  
60

1  
2  
3 risk of musculoskeletal conditions particularly lower limb osteoarthritis<sup>13,45</sup>.  
4 Interestingly, ex-footballers reported significantly lower use of drugs such as  
5 citalopram, diazepam, and temazepam which are used primarily in the treatment of  
6 depression and anxiety respectively. Although the study was not powered for  
7 medication outcomes, the use of medication in the footballer cohort was primarily for  
8 pain relief rather than relief for mental health problems. In fact, ex-footballers may have  
9 developed a certain resilience and mental toughness due to being an elite athlete  
10 which may be a protective factor for long term mental ill-health<sup>4,33,46</sup>.  
11  
12  
13  
14  
15  
16  
17  
18

19 There are several caveats to this study. Firstly, this was a postal questionnaire study  
20 focused on pain and osteoarthritis in ex-footballers<sup>13</sup>, and a community sample<sup>26</sup>, so  
21 may be subject to response bias (those with pain are more likely to respond). However,  
22 this would not explain the between group differences. Secondly, the response rate  
23 was higher in the ex-footballer cohort than the controls (63.7% vs. 22.6%) and the low  
24 response rate in controls questions the representativeness of the sample. Thirdly, the  
25 comorbidities and medications were self-reported, and due to logistical reasons  
26 relating to questionnaire length, data on established associated risk factors for  
27 depression and anxiety such as smoking status, alcohol consumption, educational,  
28 marital and economic status<sup>47-49</sup> were not available. Also, although the study did not  
29 find any differences between ex-footballers and controls in terms of mental health it  
30 would have been interesting to examine mental toughness, resilience, optimism and  
31 general pain coping mechanisms between the two populations. Future epidemiological  
32 research on this topic should explore these relationships in more detail. Lastly, this  
33 study did not specifically measure two aspects of quality of life: physical health via  
34 current physical activity levels, and, social relations via personal relationships or  
35 available social support. These data would have given us insight into current physical  
36 fitness levels, physical limitations as a consequence of musculoskeletal conditions,  
37 and whether there was adequate psychosocial support in an individual's life. These  
38 form some of the core tenets of a healthy quality of life<sup>50</sup> and may have offered robust  
39 data on previously reported anecdotal effects of bankruptcy, divorce or trauma  
40 particularly in the ex-footballers<sup>51</sup>.  
41  
42  
43  
44  
45  
46  
47  
48  
49  
50  
51  
52  
53  
54  
55  
56  
57

58 In summary, this is the largest study on anxiety, depression and quality of life in ex-  
59 professional footballers and the first to include an age-adjusted general population  
60

1  
2  
3 comparison sample. The results show that ex-footballers are just as likely to have  
4 anxiety and depression as controls, but they have lower QoL in terms of both physical  
5 and mental well-being. However, despite reporting more widespread body pain and  
6 use of analgesics, they are less likely to report cardiovascular disease or diabetes.  
7  
8 The results suggest that healthcare providers, club management and football  
9  
10 organisations should be focused on improving musculoskeletal pain management  
11  
12 strategies in ex-footballers and further study the benefits of professional sport on  
13  
14 coping and resilience mechanisms which may be protective factors for long term  
15  
16 psychological consequences such as depression and anxiety.  
17  
18  
19  
20  
21  
22  
23  
24  
25  
26  
27  
28  
29  
30  
31  
32  
33  
34  
35  
36  
37  
38  
39  
40  
41  
42  
43  
44  
45  
46  
47  
48  
49  
50  
51  
52  
53  
54  
55  
56  
57  
58  
59  
60

For peer review only

## References:

1. FIFA Big Count 2006. FIFA Facts, 2016. [http://www.fifa.com/mm/document/fifafacts/bcoffsurv/bigcount.statspackage\\_7024.pdf](http://www.fifa.com/mm/document/fifafacts/bcoffsurv/bigcount.statspackage_7024.pdf) ( Accessed 10 Oct 2016).
2. Gulliver A, Griffiths KM, Mackinnon A, et al. The mental health of Australian elite athletes. *Journal of science and medicine in sport* 2015;18(3):255-61. doi: 10.1016/j.jsams.2014.04.006 [published Online First: 2014/06/03]
3. Ekstrand J, Hagglund M, Walden M. Injury incidence and injury patterns in professional football: the UEFA injury study. *British journal of sports medicine* 2011;45(7):553-8. doi: 10.1136/bjsm.2009.060582 [published Online First: 2009/06/26]
4. Gorczynski PF, Coyle M, Gibson K. Depressive symptoms in high-performance athletes and non-athletes: a comparative meta-analysis. *British journal of sports medicine* 2017;51(18):1348-54. doi: 10.1136/bjsports-2016-096455 [published Online First: 2017/03/04]
5. Gouttebauge V, Backx FJ, Aoki H, et al. Symptoms of Common Mental Disorders in Professional Football (Soccer) Across Five European Countries. *Journal of sports science & medicine* 2015;14(4):811-8. [published Online First: 2015/12/15]
6. Rice SM, Purcell R, De Silva S, et al. The Mental Health of Elite Athletes: A Narrative Systematic Review. *Sports Medicine* 2016;46(9):1333-53. doi: 10.1007/s40279-016-0492-2
7. Turner AP, Barlow JH, Heathcote-Elliott C. Long term health impact of playing professional football in the United Kingdom. 2000;34(5):332-36. doi: 10.1136/bjsm.34.5.332 %J British Journal of Sports Medicine
8. Turner A, Barlow J, Ilbery B. Play Hurt, Live Hurt: Living with and Managing Osteoarthritis from the Perspective of Ex-professional Footballers. *Journal of health psychology* 2002;7(3):285-301. doi: 10.1177/1359105302007003222 [published Online First: 2002/05/01]
9. Armstrong S, Oomen-Early J. Social connectedness, self-esteem, and depression symptomatology among collegiate athletes versus nonathletes. *Journal of American college health : J of ACH* 2009;57(5):521-6. doi: 10.3200/jach.57.5.521-526 [published Online First: 2009/03/04]
10. Spengler A, Schneider G, Schröder E. Depressivität—Screening und Vorkommen in der sportmedizinischen Praxis. *Dtsch Z Sportmed* 2013;64:65–8.
11. Junge A, Feddermann-Demont N. Prevalence of depression and anxiety in top-level male and female football players. 2016;2(1):e000087. doi: 10.1136/bmjsem-2015-000087 %J BMJ Open Sport & Exercise Medicine

12. Prinz B, Dvořák J, Junge A. Symptoms and risk factors of depression during and after the football career of elite female players. 2016;2(1):e000124. doi: 10.1136/bmjsem-2016-000124 %J BMJ Open Sport & Exercise Medicine
13. Fernandes GS, Parekh SM, Moses J, et al. Prevalence of knee pain, radiographic osteoarthritis and arthroplasty in retired professional footballers compared with men in the general population: a cross-sectional study. *British journal of sports medicine* 2018;52(10):678-83. doi: 10.1136/bjsports-2017-097503 [published Online First: 2017/11/05]
14. Mykletun A, Stordal E, Dahl AA. Hospital Anxiety and Depression (HAD) scale: factor structure, item analyses and internal consistency in a large population. *The British journal of psychiatry : the journal of mental science* 2001;179:540-4.
15. Crawford JR, Henry JD, Crombie C, et al. Normative data for the HADS from a large non-clinical sample. *The British journal of clinical psychology* 2001;40(Pt 4):429-34. [published Online First: 2002/01/05]
16. B. Gandek, J.E. Ware, N.K. Aaronson, et al. Cross-validation of item selection and scoring for the SF-12 Health Survey in nine countries: results from the IQOLA Project. *International Quality of Life Assessment J Clin Epidemiol*, 51 1998, pp. 1171-1178
17. Ware JE, Jr., Gandek B, Kosinski M, et al. The equivalence of SF-36 summary health scores estimated using standard and country-specific algorithms in 10 countries: results from the IQOLA Project. *International Quality of Life Assessment. Journal of clinical epidemiology* 1998;51(11):1167-70. [published Online First: 1998/11/17]
18. Jenkinson C, Layte R, Jenkinson D, et al. A shorter form health survey: can the SF-12 replicate results from the SF-36 in longitudinal studies? *Journal of public health medicine* 1997;19(2):179-86. [published Online First: 1997/06/01]
19. Hays, R. D., & Stewart, A. L. Sleep measures. In A. L. Stewart & J. E. Ware (eds.), *Measuring functioning and well-being: The Medical Outcomes Study approach*, 1992. (pp. 235-259), Durham, NC: Duke University Press.
20. Allen RP, Kosinski M, Hill-Zabala CE, et al. Psychometric evaluation and tests of validity of the Medical Outcomes Study 12-item Sleep Scale (MOS sleep). *Sleep medicine* 2009;10(5):531-9. doi: 10.1016/j.sleep.2008.06.003 [published Online First: 2008/09/23]
21. Williams DA, Arnold LM. Measures of fibromyalgia: Fibromyalgia Impact Questionnaire (FIQ), Brief Pain Inventory (BPI), Multidimensional Fatigue Inventory (MFI-20), Medical Outcomes Study (MOS) Sleep Scale, and Multiple Ability Self-Report Questionnaire (MASQ). *Arthritis care & research* 2011;63 Suppl 11:S86-97. doi: 10.1002/acr.20531 [published Online First: 2012/05/25]
22. Watson D, Clark LA, Tellegen A. Development and validation of brief measures of positive and negative affect: the PANAS scales. *Journal of personality and social psychology* 1988;54(6):1063-70. [published Online First: 1988/06/01]
23. Clark LA, Watson D. Tripartite model of anxiety and depression: psychometric evidence and taxonomic implications. *Journal of abnormal psychology* 1991;100(3):316-36. [published Online First: 1991/08/01]
24. Crawford JR, Henry JD. The positive and negative affect schedule (PANAS): construct validity, measurement properties and normative data in a large non-clinical sample. *The British journal of clinical psychology* 2004;43(Pt 3):245-65. doi: 10.1348/0144665031752934 [published Online First: 2004/08/31]
25. English Indices of Deprivation, 2015. Available from. <https://www.gov.uk/government/statistics/english-indices-of-deprivation-2015> [Accessed 10th May 2018]

- 1  
2  
3  
4 26. Fernandes GS, Sarmanova A, Warner S, et al. Knee pain and related health in the community  
5 study (KPIC): a cohort study protocol. *BMC musculoskeletal disorders* 2017;18(1):404. doi:  
6 10.1186/s12891-017-1761-4  
7
- 8 27. Hunt IM, Silman AJ, Benjamin S, et al. The prevalence and associated features of chronic  
9 widespread pain in the community using the 'Manchester' definition of chronic widespread  
10 pain. *Rheumatology (Oxford, England)* 1999;38(3):275-9. [published Online First: 1999/05/18]  
11
- 12 28. Goutteborge V, Aoki H, Kerkhoffs GM. Prevalence and determinants of symptoms related to  
13 mental disorders in retired male professional footballers. *The Journal of sports medicine and*  
14 *physical fitness* 2016;56(5):648-54. [published Online First: 2016/06/11]  
15
- 16 29. Williams JW, Jr., Pignone M, Ramirez G, et al. Identifying depression in primary care: a  
17 literature synthesis of case-finding instruments. *General hospital psychiatry* 2002;24(4):225-  
18 37. [published Online First: 2002/07/09]  
19
- 20 30. J. ODP, E. FA, Liam S, et al. Factors associated with depression in a representative sample  
21 of 14 217 people aged 75 and over in the United Kingdom: results from the MRC trial of  
22 assessment and management of older people in the community. *International Journal of*  
23 *Geriatric Psychiatry* 2003;18(7):623-30. doi:10.1002/gps.896  
24
- 25 31. Office for National Statistics. Measuring National Well-being: Quality of Life in the UK, 2018.  
26 Available from: [www.ons.gov.uk/](http://www.ons.gov.uk/peoplepopulationandcommunity/wellbeing/articles/measuringnationalwellbeing/qualityoflifeintheuk2018)  
27 [peoplepopulationandcommunity/wellbeing/articles/measuringnationalwellbeing/qualityoflifeinthe](http://www.ons.gov.uk/peoplepopulationandcommunity/wellbeing/articles/measuringnationalwellbeing/qualityoflifeintheuk2018)  
28 [uk2018](http://www.ons.gov.uk/peoplepopulationandcommunity/wellbeing/articles/measuringnationalwellbeing/qualityoflifeintheuk2018) [Accessed 5<sup>th</sup> May 2018]  
29
- 30 32. Lundin A, Hallgren M, Theobald H, et al. Validity of the 12-item version of the General Health  
31 Questionnaire in detecting depression in the general population. *Public health* 2016;136:66-  
32 74. doi: 10.1016/j.puhe.2016.03.005 [published Online First: 2016/04/05]  
33
- 34 33. Jones G, Hanton S, Connaughton D. A Framework of Mental Toughness in the World's Best  
35 Performers. *The Sport Psychologist* 2007;21(2):243-64. doi: 10.1123/tsp.21.2.243  
36
- 37 34. Zeiger JS, Zeiger RS. Mental toughness latent profiles in endurance athletes. *PloS one*  
38 2018;13(2):e0193071. doi: 10.1371/journal.pone.0193071 [published Online First:  
39 2018/02/24]  
40
- 41 35. Tham, E.K.. and Weigand, D.A. Mental Toughness Strategies of the World's Greatest  
42 Athletes: the Ultimate Guidebook for developing your medal-winning potential in sport. 2010.  
43 USA: Health Sciences Academy.  
44
- 45 36. Bamford, S, Holley-Moore, G and Watson, J. New Perspective and approaches to  
46 understanding dementia and stigma. Available from:  
47 [http://www.ilcuk.org.uk/index.php/publications/publication\\_details/new\\_perspectives\\_and\\_app](http://www.ilcuk.org.uk/index.php/publications/publication_details/new_perspectives_and_approaches_to_understanding_dementia_and_stigma)  
48 [roaches\\_to\\_understanding\\_dementia\\_and\\_stigma](http://www.ilcuk.org.uk/index.php/publications/publication_details/new_perspectives_and_approaches_to_understanding_dementia_and_stigma) [Accessed 1<sup>ST</sup> May 2017]  
49
- 50 37. Breeman S, Cotton S, Fielding S, et al. Normative data for the Hospital Anxiety and  
51 Depression Scale. *Quality of Life Research* 2015;24(2):391-98. doi: 10.1007/s11136-014-  
52 0763-z  
53
- 54 38. Neville A, Peleg R, Singer Y, et al. Chronic pain: a population-based study. *The Israel Medical*  
55 *Association journal : IMAJ* 2008;10(10):676-80. [published Online First: 2008/11/18]  
56
- 57 39. McCarberg BH, Nicholson BD, Todd KH, et al. The impact of pain on quality of life and the  
58 unmet needs of pain management: results from pain sufferers and physicians participating in  
59 an Internet survey. *American journal of therapeutics* 2008;15(4):312-20. doi:  
60 10.1097/MJT.0b013e31818164f2 [published Online First: 2008/07/23]

- 1  
2  
3  
4 40. Finan, P. H., Goodin, B. R., & Smith, M. T. The association of sleep and pain: An update and  
5 a path forward. *The Journal of Pain*, 2013. *Official Journal of the American Pain*  
6 *Society*, 14(12), 1539–1552. <http://doi.org/10.1016/j.jpain.2013.08.007>  
7
- 8 41. McBeth J, Macfarlane GJ, Benjamin S, et al. Features of somatization predict the onset of  
9 chronic widespread pain: results of a large population-based study. *Arthritis and rheumatism*  
10 2001;44(4):940-6. doi: 10.1002/1529-0131(200104)44:4<940::aid-anr151>3.0.co;2-s  
11 [published Online First: 2001/04/24]  
12
- 13 42. Sullivan MJ, Thorn B, Haythornthwaite JA, et al. Theoretical perspectives on the relation  
14 between catastrophizing and pain. *The Clinical journal of pain* 2001;17(1):52-64. [published  
15 Online First: 2001/04/06]  
16
- 17 43. Larsson, C., Ekvall Hansson, E., Sundquist, K., & Jakobsson, U. Impact of pain  
18 characteristics and fear-avoidance beliefs on physical activity levels among older adults with  
19 chronic pain: a population-based, longitudinal study. *BMC Geriatrics*, 2016. 16, 50.  
20 <http://doi.org/10.1186/s12877-016-0224-3>  
21
- 22 44. Gupta A, Silman AJ, Ray D, et al. The role of psychosocial factors in predicting the onset of  
23 chronic widespread pain: results from a prospective population-based study. *Rheumatology*  
24 *(Oxford, England)* 2007;46(4):666-71. doi: 10.1093/rheumatology/kel363 [published Online  
25 First: 2006/11/07]  
26
- 27 45. Sarna S, Kaprio J, Kujala UM, et al. Health status of former elite athletes. The Finnish  
28 experience. *Aging (Milan, Italy)* 1997;9(1-2):35-41. [published Online First: 1997/02/01]  
29
- 30 46. Nicholls, A.R. , Polman, R.C.J. , Levy, A.R., , Backhouse, S.H. Mental toughness, optimism,  
31 pessimism, and coping among athletes. *Personality and Individual Differences*,  
32 2008. 44, 1182–1192  
33
- 34 47. Beekman AT, Deeg DJ, van Tilburg T, et al. Major and minor depression in later life: a study  
35 of prevalence and risk factors. *Journal of affective disorders* 1995;36(1-2):65-75. [published  
36 Online First: 1995/12/24]  
37
- 38 48. Martin G. Cole, Nandini Dendukuri. Risk Factors for Depression Among Elderly Community  
39 Subjects: A Systematic Review and Meta-Analysis. *American Journal of Psychiatry*  
40 2003;160(6):1147-56. doi: 10.1176/appi.ajp.160.6.1147  
41
- 42 49. Wolanin A, Gross M, Hong E. Depression in athletes: prevalence and risk factors. *Current*  
43 *sports medicine reports* 2015;14(1):56-60. doi: 10.1249/jsr.000000000000123 [published  
44 Online First: 2015/01/13]  
45
- 46 50. World Health Organisation (WHO) 2018. Measuring Quality of Life. Available from:  
47 <http://www.who.int/healthinfo/survey/whoqol-qualityoflife/en/index4.html> [Accessed 2nd Feb  
48 2018]  
49
- 50 51. Gernon, A. 2016. Retired: What Happens to Footballers When the Game's Up. Durrington:  
51 Pitch Publishing.  
52  
53  
54  
55  
56  
57  
58  
59  
60

## Acknowledgements and Affiliations:

### Acknowledgements

The study was funded by the Arthritis Research UK Centre for Sports, Exercise and Osteoarthritis (Grant 20194). The study was also funded by FIFA's Medical Assessment and Research Centre as well as the Professional Footballers' Association.

We are grateful to the Arthritis Research UK Pain Centre in Nottingham for access to KPIC participants. We would like to acknowledge the invaluable assistance and advice from Dr Charlotte Cowie (SPIRE), Richard Jobson, John Bramhall and Ben Simpson in the administration of players' database with the support of the Professional Football Association.

### Affiliations

None of the study sponsors/funders were involved in the study design, in the collection, analysis and interpretation of data, in the writing of the report and in the decision to submit the article for publication.

All researchers were independent from funders.

All authors had full access to all the data in the study and take responsibility for the integrity of the data and the accuracy of the data analysis.



## Declarations:

### Consent:

The study was approved by Nottingham University Hospitals NHS Trust and the Nottingham Research Ethics Committee 1 (Refs 14/EM/0045 & 14/EM/0015) and registered (clinicaltrials.gov portal: NCT02098044 & NCT02098070).

All participants offered consent by responding to the postal questionnaire survey and written informed consent prior to radiographic assessment at the SPIRE Hospitals and the Nottingham City Hospital.

### Contributor's statement:

GSF designed the data collection tools, wrote the statistical plan, implemented the study design (conducted the study), conducted cleaning and analysis of the data, wrote the initial drafts of the paper and subsequently revised the paper after feedback from the team. SMP designed the data collection tools, wrote the statistical plan, implemented the study design (conducted the study), conducted cleaning and analysis of the data, and drafted and revised the paper. JPM conducted cleaning and analysis of the data, and drafted and revised the paper. CWF conceptualised the study and drafted and revised the paper. BS conceptualised the study and drafted and revised the paper. MEB monitored data collection and drafted and revised the paper. WZ conceptualised and designed the study and data collection tools, wrote the statistical plan, monitored data collection and drafted and revised the paper. MD conceptualised and designed the study and data collection tools, monitored data collection and drafted and revised the paper. He is guarantor.

### Patient and Public Involvement:

The study was supported by a patient advisory group which provided input to the programme of research. Patients and ex-professional footballers partnered with us for the design of the study, the informational material to support the intervention, and the burden of the questionnaire from the patient's perspective. At the end of the study the patient advisory group commented on the findings and contributed to the dissemination plan and this included input on poster and oral presentations at local, national and international conferences.

### Conflict of Interest Disclosures:

All authors have completed the ICMJE uniform disclosure form at [www.icmje.org/coi\\_disclosure.pdf](http://www.icmje.org/coi_disclosure.pdf) and declare: financial support (research grant) for the submitted work from FIFA Medical Assessment and Research Centre, other from Arthritis Research UK Centre for Sports, Exercise and Osteoarthritis (Grant Reference 20194); research grant from the Professional Footballers' Association and financial support from the SPIRE Healthcare Group at the Football Association (St George's Park); CF did paid consultancy for FIFA Medical Assessment and Research Centre, the Football Association and the Premier League in the past three years and has received personal fees from these bodies outside the remit of the submitted work; MD received research funding by AstraZeneca, Nordic Biosciences, Roche, outside the submitted work; Dr. Zhang reports grants from Arthritis Research UK, grants from Arthritis Research UK, during the conduct of the study; other from AstraZeneca, other from Daiichi Sankyo, other from Biobarica, other from Hisun, outside the submitted work; no financial relationships with any organisation that might have an interest in the

1  
2  
3 submitted work in the previous three years for any other authors; no other relationships  
4 or activities that could appear to have influenced the submitted work.  
5

6 Copyright / license for publication

7 “The Corresponding Author has the right to grant on behalf of all authors and does  
8 grant on behalf of all authors, a worldwide license to the Publishers and its licensees  
9 in perpetuity, in all forms, formats and media (whether known now or created in the  
10 future), to i) publish, reproduce, distribute, display and store the Contribution, ii)  
11 translate the Contribution into other languages, create adaptations, reprints, include  
12 within collections and create summaries, extracts and/or, abstracts of the Contribution,  
13 iii) create any other derivative work(s) based on the Contribution, iv) to exploit all  
14 subsidiary rights in the Contribution, v) the inclusion of electronic links from the  
15 Contribution to third party material where-ever it may be located; and, vi) license any  
16 third party to do any or all of the above.”  
17  
18  
19

20 Data Sharing: No additional data available.  
21

22 Transparency Declaration: Professor Michael Doherty (MD) affirms that the  
23 manuscript is an honest, accurate, and transparent account of the study being  
24 reported and that no important aspects of the study have been omitted.  
25  
26  
27  
28  
29  
30  
31  
32  
33  
34  
35  
36  
37  
38  
39  
40  
41  
42  
43  
44  
45  
46  
47  
48  
49  
50  
51  
52  
53  
54  
55  
56  
57  
58  
59  
60

1  
2  
3  
4  
5  
6  
7  
8  
9  
10  
11  
12  
13  
14  
15  
16  
17  
18  
19  
20  
21  
22  
23  
24  
25  
26  
27  
28  
29  
30  
31  
32  
33  
34  
35  
36  
37  
38  
39  
40  
41  
42  
43  
44  
45  
46  
47  
48  
49  
50  
51  
52  
53  
54  
55  
56  
57  
58  
59  
60

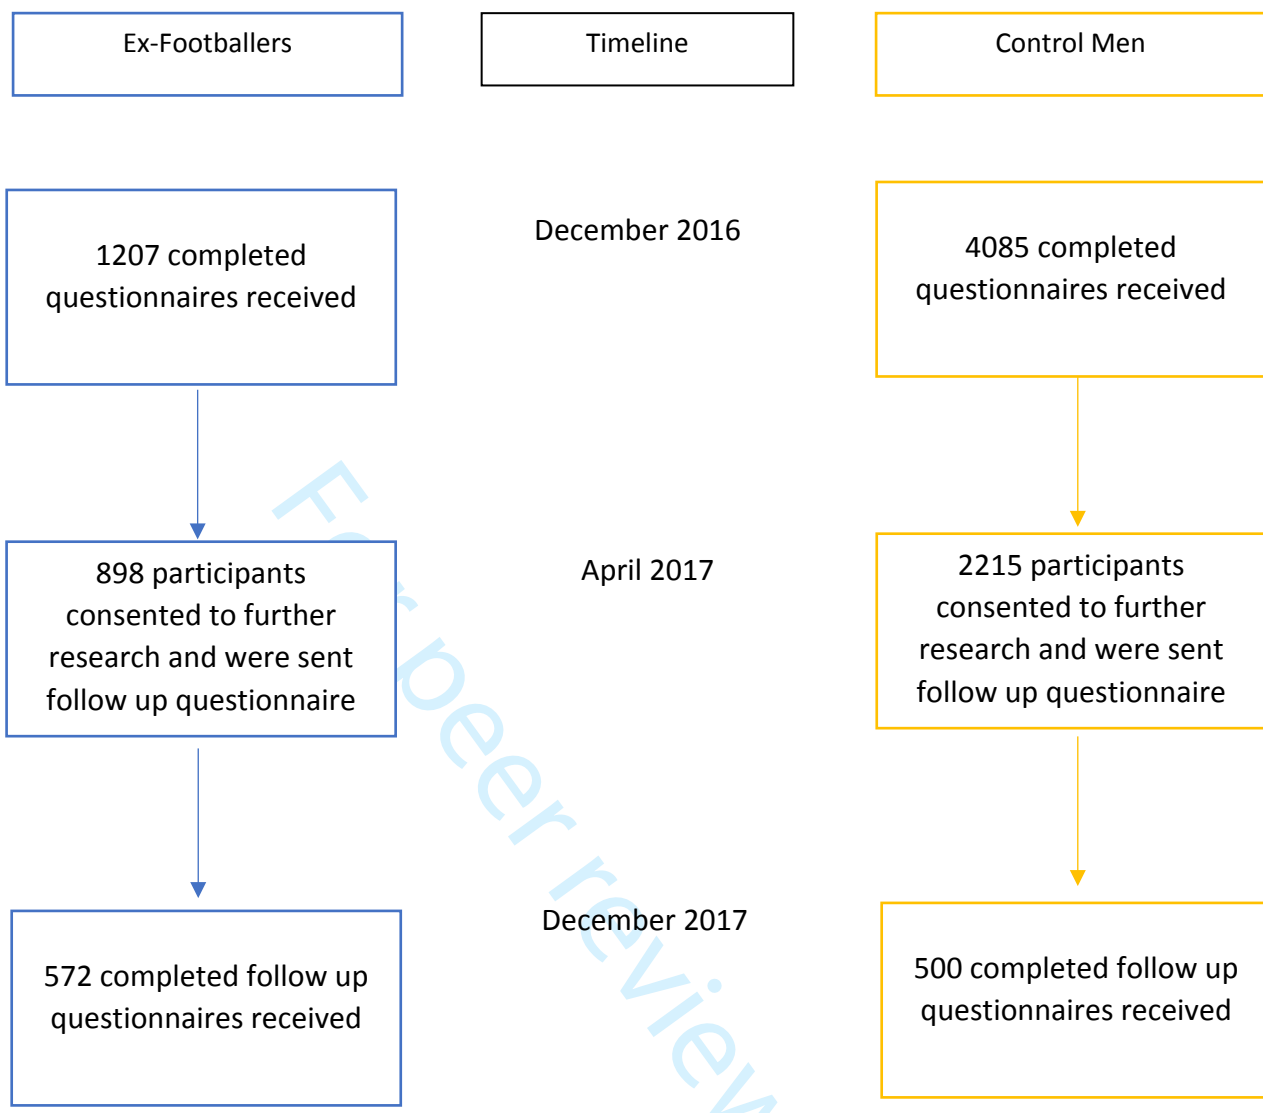

**STROBE 2007 (v4) checklist of items to be included in reports of observational studies in epidemiology\***  
**Checklist for cohort, case-control, and cross-sectional studies (combined)**

| Section/Topic             | Item # | Recommendation                                                                                                                                                                                                                                                                                                                                                                                                                                                         | Reported on page # |
|---------------------------|--------|------------------------------------------------------------------------------------------------------------------------------------------------------------------------------------------------------------------------------------------------------------------------------------------------------------------------------------------------------------------------------------------------------------------------------------------------------------------------|--------------------|
| Title and abstract        | 1      | (a) Indicate the study's design with a commonly used term in the title or the abstract                                                                                                                                                                                                                                                                                                                                                                                 | Page 1 and 2       |
|                           |        | (b) Provide in the abstract an informative and balanced summary of what was done and what was found                                                                                                                                                                                                                                                                                                                                                                    | Page 2             |
| <b>Introduction</b>       |        |                                                                                                                                                                                                                                                                                                                                                                                                                                                                        |                    |
| Background/rationale      | 2      | Explain the scientific background and rationale for the investigation being reported                                                                                                                                                                                                                                                                                                                                                                                   | Page 4 and 5       |
| Objectives                | 3      | State specific objectives, including any pre-specified hypotheses                                                                                                                                                                                                                                                                                                                                                                                                      | Page 5             |
| <b>Methods</b>            |        |                                                                                                                                                                                                                                                                                                                                                                                                                                                                        |                    |
| Study design              | 4      | Present key elements of study design early in the paper                                                                                                                                                                                                                                                                                                                                                                                                                | Page 6             |
| Setting                   | 5      | Describe the setting, locations, and relevant dates, including periods of recruitment, exposure, follow-up, and data collection                                                                                                                                                                                                                                                                                                                                        | Pages 6-9          |
| Participants              | 6      | (a) <i>Cohort study</i> —Give the eligibility criteria, and the sources and methods of selection of participants. Describe methods of follow-up<br><i>Case-control study</i> —Give the eligibility criteria, and the sources and methods of case ascertainment and control selection. Give the rationale for the choice of cases and controls<br><i>Cross-sectional study</i> —Give the eligibility criteria, and the sources and methods of selection of participants | Page 6             |
|                           |        | (b) <i>Cohort study</i> —For matched studies, give matching criteria and number of exposed and unexposed<br><i>Case-control study</i> —For matched studies, give matching criteria and the number of controls per case                                                                                                                                                                                                                                                 | Page 10-11         |
| Variables                 | 7      | Clearly define all outcomes, exposures, predictors, potential confounders, and effect modifiers. Give diagnostic criteria, if applicable                                                                                                                                                                                                                                                                                                                               | Page 7-9           |
| Data sources/ measurement | 8*     | For each variable of interest, give sources of data and details of methods of assessment (measurement). Describe comparability of assessment methods if there is more than one group                                                                                                                                                                                                                                                                                   | Page 7-9           |
| Bias                      | 9      | Describe any efforts to address potential sources of bias                                                                                                                                                                                                                                                                                                                                                                                                              | Page 9 and page 16 |
| Study size                | 10     | Explain how the study size was arrived at                                                                                                                                                                                                                                                                                                                                                                                                                              | Page 10, 11        |
| Quantitative variables    | 11     | Explain how quantitative variables were handled in the analyses. If applicable, describe which groupings were chosen and why                                                                                                                                                                                                                                                                                                                                           | Page 7-9           |
| Statistical methods       | 12     | (a) Describe all statistical methods, including those used to control for confounding                                                                                                                                                                                                                                                                                                                                                                                  | Page 10            |
|                           |        | (b) Describe any methods used to examine subgroups and interactions                                                                                                                                                                                                                                                                                                                                                                                                    | n/a                |
|                           |        | (c) Explain how missing data were addressed                                                                                                                                                                                                                                                                                                                                                                                                                            | Page 10            |
|                           |        | (d) <i>Cohort study</i> —If applicable, explain how loss to follow-up was addressed<br><i>Case-control study</i> —If applicable, explain how matching of cases and controls was addressed                                                                                                                                                                                                                                                                              | n/a                |

|                          |     |                                                                                                                                                                                                              |                           |
|--------------------------|-----|--------------------------------------------------------------------------------------------------------------------------------------------------------------------------------------------------------------|---------------------------|
|                          |     | <i>Cross-sectional study</i> —If applicable, describe analytical methods taking account of sampling strategy                                                                                                 |                           |
|                          |     | (e) Describe any sensitivity analyses                                                                                                                                                                        | none                      |
| <b>Results</b>           |     |                                                                                                                                                                                                              |                           |
| Participants             | 13* | (a) Report numbers of individuals at each stage of study—eg numbers potentially eligible, examined for eligibility, confirmed eligible, included in the study, completing follow-up, and analysed            | Flow chart figure page 11 |
|                          |     | (b) Give reasons for non-participation at each stage                                                                                                                                                         |                           |
|                          |     | (c) Consider use of a flow diagram                                                                                                                                                                           | Figure 1                  |
| Descriptive data         | 14* | (a) Give characteristics of study participants (eg demographic, clinical, social) and information on exposures and potential confounders                                                                     | Page 11                   |
|                          |     | (b) Indicate number of participants with missing data for each variable of interest                                                                                                                          | Page 10                   |
|                          |     | (c) <i>Cohort study</i> —Summarise follow-up time (eg, average and total amount)                                                                                                                             |                           |
| Outcome data             | 15* | <i>Cohort study</i> —Report numbers of outcome events or summary measures over time                                                                                                                          |                           |
|                          |     | <i>Case-control study</i> —Report numbers in each exposure category, or summary measures of exposure                                                                                                         | Page 11-13                |
|                          |     | <i>Cross-sectional study</i> —Report numbers of outcome events or summary measures                                                                                                                           |                           |
| Main results             | 16  | (a) Give unadjusted estimates and, if applicable, confounder-adjusted estimates and their precision (eg, 95% confidence interval). Make clear which confounders were adjusted for and why they were included | Page 12-13                |
|                          |     | (b) Report category boundaries when continuous variables were categorized                                                                                                                                    |                           |
|                          |     | (c) If relevant, consider translating estimates of relative risk into absolute risk for a meaningful time period                                                                                             |                           |
| Other analyses           | 17  | Report other analyses done—eg analyses of subgroups and interactions, and sensitivity analyses                                                                                                               |                           |
| <b>Discussion</b>        |     |                                                                                                                                                                                                              |                           |
| Key results              | 18  | Summarise key results with reference to study objectives                                                                                                                                                     | Page 14                   |
| Limitations              | 19  | Discuss limitations of the study, taking into account sources of potential bias or imprecision. Discuss both direction and magnitude of any potential bias                                                   | Page 14-16                |
| Interpretation           | 20  | Give a cautious overall interpretation of results considering objectives, limitations, multiplicity of analyses, results from similar studies, and other relevant evidence                                   | Page 14-16                |
| Generalisability         | 21  | Discuss the generalisability (external validity) of the study results                                                                                                                                        | Page 17                   |
| <b>Other information</b> |     |                                                                                                                                                                                                              |                           |
| Funding                  | 22  | Give the source of funding and the role of the funders for the present study and, if applicable, for the original study on which the present article is based                                                | Page 22                   |

\*Give information separately for cases and controls in case-control studies and, if applicable, for exposed and unexposed groups in cohort and cross-sectional studies.  
**Note:** An Explanation and Elaboration article discusses each checklist item and gives methodological background and published examples of transparent reporting. The STROBE checklist is best used in conjunction with this article (freely available on the Web sites of PLoS Medicine at <http://www.plosmedicine.org/>, Annals of Internal Medicine at <http://www.annals.org/>, and Epidemiology at <http://www.epidem.com/>). Information on the STROBE Initiative is available at [www.strobe-statement.org](http://www.strobe-statement.org).

# BMJ Open

## Depression and the General Health of Retired Professional Footballers compared to the General Population in the United Kingdom: A Case Control Study

|                                 |                                                                                                                                                                                                                                                                                                                                                                                                                                                                                                                                                                                                                                                                              |
|---------------------------------|------------------------------------------------------------------------------------------------------------------------------------------------------------------------------------------------------------------------------------------------------------------------------------------------------------------------------------------------------------------------------------------------------------------------------------------------------------------------------------------------------------------------------------------------------------------------------------------------------------------------------------------------------------------------------|
| Journal:                        | <i>BMJ Open</i>                                                                                                                                                                                                                                                                                                                                                                                                                                                                                                                                                                                                                                                              |
| Manuscript ID                   | bmjopen-2019-030056.R1                                                                                                                                                                                                                                                                                                                                                                                                                                                                                                                                                                                                                                                       |
| Article Type:                   | Research                                                                                                                                                                                                                                                                                                                                                                                                                                                                                                                                                                                                                                                                     |
| Date Submitted by the Author:   | 20-May-2019                                                                                                                                                                                                                                                                                                                                                                                                                                                                                                                                                                                                                                                                  |
| Complete List of Authors:       | Fernandes, Gwen; University of Nottingham, Academic Rheumatology, School of Medicine<br>Parekh, Sanjay; University of Nottingham, Academic Rheumatology, School of Medicine<br>Moses, Jonathan; University of Nottingham, Academic Rheumatology, School of Medicine<br>Fuller, Colin; University of Nottingham<br>Scammell, Brigitte; University of Nottingham, Academic Rheumatology, School of Medicine<br>Batt, Mark ; University of Nottingham, Academic Rheumatology, School of Medicine<br>Zhang, Weiya; University of Nottingham, Academic Rheumatology, School of Medicine<br>Doherty, Michael ; University of Nottingham, Academic Rheumatology, School of Medicine |
| <b>Primary Subject Heading</b>: | Mental health                                                                                                                                                                                                                                                                                                                                                                                                                                                                                                                                                                                                                                                                |
| Secondary Subject Heading:      | Sports and exercise medicine, Epidemiology                                                                                                                                                                                                                                                                                                                                                                                                                                                                                                                                                                                                                                   |
| Keywords:                       | professional football, Depression & mood disorders < PSYCHIATRY, Anxiety disorders < PSYCHIATRY, pain                                                                                                                                                                                                                                                                                                                                                                                                                                                                                                                                                                        |
|                                 |                                                                                                                                                                                                                                                                                                                                                                                                                                                                                                                                                                                                                                                                              |

SCHOLARONE™  
Manuscripts

## Depression and the General Health of Retired Professional Footballers compared to the General Population in the United Kingdom: A Case Control Study

Gwen Sascha Fernandes, research fellow<sup>1,2,3</sup>, Sanjay Parekh, doctoral student <sup>1,2</sup>, Jonathan Moses, foundation doctor<sup>1,2,5</sup>, Colin Fuller, risk management consultant<sup>2,4</sup>, Brigitte Scammell, professor of orthopaedics<sup>1,2,3,5</sup>, Mark Edward Batt, professor of sports and exercise medicine<sup>1,2,5</sup>, Weiya Zhang, professor of epidemiology<sup>1,2,3</sup>, Michael Doherty, professor of rheumatology<sup>1,2,3</sup>

1: Division of Rheumatology, Orthopaedics and Dermatology (School of Medicine, University of Nottingham), Academic Rheumatology, Nottingham City Hospital, NG5 1PB

2: Arthritis Research UK Centre for Sports, Exercise and Osteoarthritis, Queens Medical Centre, Derby Road, NG7 2UH

3: Arthritis Research UK Pain Centre, Nottingham City Hospital, NG5 1PB

4: Colin Fuller Consultancy Ltd, Sutton Bonnington, LE12 6PF

5: Nottingham University Hospitals NHS Trust, Queens Medical Centre, Derby Road, NG7 2UH

Correspondence to: Professor Weiya Zhang

Address: Academic Rheumatology, Clinical Sciences Building, Nottingham City Hospital, University of Nottingham, NG5 1PB.

Tel: 01158231756

Email: [weiya.zhang@nottingham.ac.uk](mailto:weiya.zhang@nottingham.ac.uk)

Manuscript Word Count: 3330 words

## Abstract

Objectives: To determine the prevalence of depression and general health of male ex-professional footballers compared to general population controls.

Methods: 572 retired professional footballers and 500 general population controls in the UK were assessed by postal questionnaire. Anxiety and depression were defined using the Hospital Anxiety and Depression Scale (HADS) using a threshold score of  $\geq 11$  to indicate probable caseness. General health was ascertained using: the SF-12 quality of life tool; self-reported comorbidities, analgesic usage and body pain; and index of multiple deprivation (IMD) based on postcode data. Mood was assessed using the positive and negative affect scale (PANAS) and sleep using the Medical Outcome Survey (MOS). Linear regression analysis was used to determine relative risk (aRR) with 95% confidence intervals (CI) and adjusted for age, body mass index (BMI), comorbidities, body pain and medication usage.

Results: Depression prevalence in retired professional footballers was 5.66% compared to 5.76% in the general population and anxiety prevalence was also comparable (12.01% vs. 10.29%; all  $p > 0.05$ ). However, footballers had lower physical and mental component scores compared to controls ( $p < 0.01$ ). They also reported significantly more sleep problems, more negative mood profiles and more widespread body pain (aRR 1.88, 95% CI 1.15 - 3.09). They also reported greater pain medication usage compared with controls (aRR 1.54, 95% CI 1.26 - 1.89). However, compared to controls they were 26% (95% CI, 15% - 37%) less likely to report comorbidities, especially heart attacks (57%, 95% CI 27% - 74%) and diabetes (61%, (95% CI 37% - 76%).

Conclusions: The prevalence of depression and anxiety in ex-professional footballers is comparable to general population controls. However, ex-footballers reported lower health-related quality of life, more widespread body pain and higher analgesic usage. Conversely lower reporting of diabetes and heart attacks indicate potential long-term physical health benefits from professional football.



1  
2  
3  
4  
5  
6  
7  
8  
9  
10  
11  
12  
13  
14  
15  
16  
17  
18  
19  
20  
21  
22  
23  
24  
25  
26  
27  
28  
29  
30  
31  
32  
33  
34  
35  
36  
37  
38  
39  
40  
41  
42  
43  
44  
45  
46  
47  
48  
49  
50  
51  
52  
53  
54  
55  
56  
57  
58  
59  
60  

Keywords:

*Professional football, epidemiology, depression, anxiety, sleep, pain, cardiovascular health*

Article Summary:

*Strengths and Limitations of this study*

Strengths:

Largest study of depression and general health in ex-professional footballers and controls in the UK

Case-control study design with control male participants recruited from a community-based population sample representative of the UK general population

Depression and anxiety assessed using the validated Hospital Anxiety and Depression Scale in both ex-footballers cases and general population control men.

Limitations:

Outcomes were self-reported by participants using postal questionnaires

Lack of current or previous physical activity levels assessed

Higher response rate in the ex-footballers compared to the control participants.

## Introduction

Football is the world's most popular sport with over 300 million active players worldwide and 110,000 athletes registered at a professional level<sup>1</sup>. There has been considerable interest in whether the mental health of athletes is often compromised, especially by anxiety and depression<sup>2</sup>. Retired professional footballers may experience unique psychological stress factors primarily due to the nature and the intensity of the sport where severe or recurrent injuries are common<sup>3</sup>. Also, the pressures of competition, training and maintaining high-performance levels are hallmarks of a successful professional career<sup>4</sup>. The intensity of mental and physical demands may increase their susceptibility to certain mental health problems and risk-taking behaviour.

Despite individual high-profile cases of depression in professional footballers in the United Kingdom (e.g. Gary Speed, Paul Gascoigne, Clarke Carlisle), there is a lack of robust epidemiological studies on mental health issues in professional footballers. Studies on European former professional footballers from countries such as the Netherlands have reported anxiety and depression prevalence figures ranging from 25-43%<sup>5</sup>. However, none of these studies included a non-athlete or general population comparison group. A recent systematic review suggests that despite a seemingly higher risk of anxiety and depression in athletes in a range of elite sport, the figures are broadly comparable to the general population. The review further concluded that the evidence base is restricted by a paucity of high-quality study designs particularly in professional footballers<sup>6</sup>. Turner et al.<sup>7</sup> also found that anxiety and depression featured in 37% of former players with knee pain and knee osteoarthritis. A subsequent phenomenological study<sup>8</sup> suggested that these may be common sequelae of significant sport injuries that caused frustration and associated participation restrictions and limitations to work, social and leisure activities. However, studies focused on mental health and quality of life (QoL) of athletes are limited by study design; lack of power and small sample sizes; and comparison across sporting populations<sup>2,9-12</sup>. Therefore, there is a need for studies that: are focused on an individual sport such as professional football and its full-time players; are adequately powered for depression outcomes; include an age-adjusted control population; and investigate comorbidities and auxiliary measures of mental health and QoL indicators

1  
2  
3 such as sleep patterns, mood profiles and pain distribution including use of pain  
4 medication  
5  
6  
7

8 Therefore, based on previous research and the gaps in the evidence base, the  
9 objectives of the present study were to: (1) determine the prevalence of anxiety and  
10 depression in retired professional footballers compared to general population controls;  
11 (2) determine the general health in retired professional footballers compared to  
12 general population controls; and (3) determine the risk and protective factors  
13 associated with professional football.  
14  
15  
16  
17  
18  
19  
20  
21  
22  
23  
24  
25  
26  
27  
28  
29  
30  
31  
32  
33  
34  
35  
36  
37  
38  
39  
40  
41  
42  
43  
44  
45  
46  
47  
48  
49  
50  
51  
52  
53  
54  
55  
56  
57  
58  
59  
60

For peer review only

## Methods

The Nottingham Research Ethics Committee 1 (Refs 14/EM/0045 & 14/EM/0015) approved this study. A cross-sectional design was used, involving a series of postal questionnaire surveys to ex-footballers and to a sample of men in the general population (aged 40 years and over) to gain information on anxiety, depression, mood and sleep as well as simple demographics, occupational history, general health (comorbidities) and current medications. The exclusion criteria at baseline were known terminal illness, severe psychiatric illness or dementia, or any other condition or circumstance considered by their General Practice to make them unsuitable to receive the questionnaire.

### Patient and Public Involvement

The study was supported by a patient advisory group which provided input to the programme of research. Patients and ex-professional footballers partnered with us for the design of the study, the informational material to support the intervention, and the burden of the questionnaire from the patient's perspective. At the end of the study the patient advisory group commented on the findings and contributed to the dissemination plan and this included input on poster and oral presentations at local, national and international conferences.

### Participants

The recruitment of the source sample of ex-footballers and general population controls has been detailed in a previous publication examining the risk of knee pain and osteoarthritis in the footballers versus the controls<sup>13</sup>. Ex-footballers were recruited via the Professional Footballers' Association (PFA) and former players' associations (n=21 professional clubs). Inclusion criteria for ex-footballers were men aged over 40 years who had played professionally (in the top four tiers of the English Football League). The comparison group were recruited from the Knee Pain and Related Health in the Community Study (KPIC), involving recruitment via 12 general practitioner/family medicine (GP) practices in the UK Midlands region. All men on these UK National Health Service GP registers aged 40 years and older who were not terminally ill, were able to give written informed consent and had no other reason judged by the GPs to exclude them from the study were sent the questionnaire.

1  
2  
3 Individuals who indicated interest in further research conducted by the University of  
4 Nottingham were subsequently contacted with a follow-up questionnaire focused on  
5 mental health and QoL.  
6  
7  
8  
9

### 10 Questionnaire Survey

11 The postal questionnaire was developed based on previously published  
12 questionnaires and using extensively validated tools in the retired footballers and the  
13 control population. Through public and patient involvement, pilot versions of the  
14 questionnaire were evaluated to identify any problems with content, language and  
15 layout. The questionnaires were similarly constructed to capture detailed information  
16 about all participants (including football career history for retired footballers),  
17 anthropometric details (age and body mass index (BMI)), medical history and current  
18 medication usage.  
19  
20  
21  
22  
23  
24  
25  
26  
27

### 28 Age and body mass index (BMI)

29 Participants self-reported their date of birth and height and weight in the returned  
30 questionnaires. BMI was calculated as the weight divided by the square of height  
31 (kg/m<sup>2</sup>).  
32  
33  
34  
35

### 36 Anxiety and depression

37 Anxiety and depression were determined using the Hospital Anxiety and Depression  
38 Scale (HADS) which is comprised of 14 items, equally divided between the two mood  
39 states (anxiety and depression). Each item has a 4-point rating scale. Responders are  
40 asked to indicate their feelings based on the previous one week with recommended  
41 cut-off points indicating whether the responder is: a) within the normal range (scores  
42 of 0-7), b) mild-moderate caseness (scores of 8-10) and, c) severe caseness (scores  
43 of 11-21). Although cut-offs of > 8 have been used in some studies to indicate anxiety  
44 or depression<sup>14</sup> this threshold is considered too low and lacking in sensitivity for use  
45 in a general population sample<sup>15</sup> so a cut-off of  $\geq 11$  was used to identify definite  
46 anxiety and definite depression. This cut-off has been defined using psychiatric ratings  
47 of anxiety and depression disorders<sup>16</sup>. Whilst the gold-standard for a clinical diagnosis  
48 of generalized anxiety disorder or major depressive disorder is a detailed evaluation  
49 of symptom criteria using the Diagnostic and Statistical Manual of Mental Disorders  
50 (DSM-5), research has shown that it compares consistently with HADS data both for  
51  
52  
53  
54  
55  
56  
57  
58  
59  
60

1  
2  
3 sensitivity and specificity<sup>17</sup>. As the HADS is also simple, easy to administer and  
4 relatively short compared to the DSM-5<sup>18</sup>, we chose to include it as part of the postal  
5 questionnaires mailed to over 40,000 participants in this study.  
6  
7  
8  
9

### 10 Quality of Life Measures; Mental Health and Physical Health Component Scores

11 QoL was assessed using the Medical Outcome Study Short Form-36 Health Survey  
12 Questionnaire (SF-36) in the ex-footballers which was converted into SF-12 and the  
13 Medical Outcome Study Short Form-12 Health Survey Questionnaire (SF-12) in the  
14 general population controls. The difference in SF versions used was due to logistical  
15 factors: the SF-12 was a survey embedded within a questionnaire posted to the  
16 general population controls whose focus was on knee osteoarthritis outcomes and not  
17 mental health per se. As a result of these page restrictions, we used the shortened  
18 version, SF-12, for the controls compared to the second follow-up questionnaire  
19 posted to the ex-footballers which contained the SF-36. In order to aid comparison,  
20 the SF-36 outcomes were transformed into SF-12 outcomes as detailed by Jenkinson  
21 and colleagues<sup>19</sup>. Each SF response was used to calculate scores in each of the eight  
22 domains: physical functioning; role physical; bodily pain; general health perception;  
23 vitality; social functioning; role emotional; and mental health. These figures were then  
24 standardised using z-score transformations using means and standard deviations  
25 previously described<sup>19</sup>. Using the z scores for each scale, the aggregate score for two  
26 summary scales: the Mental Health Component Score (MCS) and the Physical Health  
27 Component Score (PCS) were calculated. Finally, the scores were standardised to a  
28 T-score where the mean was set to 50 and the standard deviation to 10. For the SF-  
29 12, scoring was conducted according to previously published data<sup>20,21</sup>. Item weights  
30 for response categories from an American population-based study, which was found  
31 comparable to other population studies in nine other countries including the United  
32 Kingdom, was used to standardise responses<sup>19</sup>. There is considerable evidence  
33 suggesting that the PCS and MCS from the SF-12 show similar levels of precision to  
34 the summary scores derived from the longer SF-36 version. Even though summary  
35 scores are not exactly identical the level of difference between the two is small and is  
36 not subjectively or clinically meaningful<sup>22</sup>.  
37  
38  
39  
40  
41  
42  
43  
44  
45  
46  
47  
48  
49  
50  
51  
52  
53  
54  
55  
56  
57

### 58 Medical Outcome Survey (MOS) Sleep Scale

1  
2  
3 The sleep scale from MOS is a 12-item measure that is generic and not disease  
4 specific and measures 6 dimensions of sleep: sleep disturbance, snoring, shortness  
5 of breath with headache, sleep adequacy, somnolence and quantity of sleep<sup>23</sup>. The  
6 tool has demonstrated excellent reliability and validity for assessing sleep in  
7 community samples<sup>24,25</sup>. A sleep problems index (SLP-9) can be calculated using nine  
8 items from the MOS Sleep scale indicating quality of sleep on a 0-100 scale. The  
9 higher the score, the lower the quality of sleep. The quantity of sleep is recorded as  
10 the average hours of sleep per night over the previous 4-week period and was  
11 dichotomised as optimal sleep (if this was 7-8 hours) or non-optimal if this was less  
12 than 7 hours or greater than 8 hours as per MOS sleep scoring criteria.  
13  
14  
15  
16  
17  
18  
19  
20  
21

### 22 Positive and Negative Affect Scale (PANAS)

23 PANAS is a self-report questionnaire comprising two 10-item scales, which describe  
24 different feelings and emotions measuring both positive and negative affect<sup>26</sup>. The  
25 questionnaire asked responders to consider their feelings at the time of completing the  
26 questionnaire. The normal population reference guides for mean positive affect score  
27 is 29.7 (+ 7.9) and mean negative affect score is 14.8 (+ 5.4). PANAS has  
28 demonstrated high reliability and construct validity, is brief and ideal for use in self-  
29 reported questionnaires and has been used extensively alongside measures of anxiety  
30 and depression such as HADS<sup>27,28</sup>.  
31  
32  
33  
34  
35  
36  
37  
38  
39

### 40 Indices of Multiple Deprivation

41 The Index of Multiple Deprivations (IMD) is an official measure of the relative  
42 deprivation in England<sup>29</sup>. It ranks all areas in England from 1 (most deprived) to 32,844  
43 (least deprived area) and is based on weights given to key domains such as income,  
44 employment, education and housing. It uses postcodes to determine an overall  
45 measure of deprivation. This information was then presented in quintiles with  
46 percentage of footballers and controls within the lowest and highest quintiles.  
47  
48  
49  
50  
51  
52

### 53 Comorbidities

54 Individual comorbidities were self-reported according to a brief specific checklist  
55 enquiry (fibromyalgia, diabetes, heart attacks, hypertension, cancer), with data  
56 dichotomised into individuals with or without these conditions. An open text question  
57  
58  
59  
60

1  
2  
3 was also included to capture information on any other diagnosed medical conditions  
4 not on the checklist<sup>30</sup>.  
5  
6

### 7 8 **Widespread Body Pain** 9

10 Widespread body pain was self-reported using a body pain mannequin<sup>31</sup>. It was scored  
11 using the American College of Rheumatology criteria for widespread body pain whose  
12 definition is pain in each of the four quadrants of the body and including the spinal or  
13 axial column. Reported pain in any part of the body was dichotomous (present/absent)  
14 and total number of regions with pain was a simple count of the shaded regions of the  
15 manikin.  
16  
17  
18  
19

### 20 21 **Pain-relieving Medication** 22

23 Self-reported analgesic medication (both prescribed and over the counter) was  
24 recorded and grouped as all pain-relieving medication, and sub-grouped as anti-  
25 inflammatory drugs (NSAIDs), opioids, other over the counter (OTC) and prescribed  
26 analgesics, and other medications with pain-modifying properties (e.g. citalopram and  
27 amitriptyline).  
28  
29  
30  
31  
32

### 33 34 **Statistical Analyses** 35

36 A power calculation was conducted based on a 12.6% prevalence of depression in a  
37 non-clinical sample of community-derived adults using the HADS<sup>15</sup> and an odds ratio  
38 (OR) of 2 after adjustment for other known factors in ex-footballers. The sample size  
39 required to detect this OR, with 90% power and a 0.05% significance level, was 336  
40 participants per group.  
41  
42

43 Categorical variables were reported as frequencies and percentages, and continuous  
44 variables as mean and standard deviations (SD). To determine whether distributions  
45 of the variables were statistically significant between ex-footballers and controls a t-  
46 test (continuous variables) or chi-square test (categorical variables) was used. For the  
47 SF-12 outcomes, specifically the physical component score and mental component  
48 score between footballers and controls, we used the ranksum command in Stata,  
49 which compared two independent samples using the Mann-Whitney two-sample  
50 statistic. Statistical significance was defined as  $p < 0.05$ . We had very few missing  
51 data at random (e.g, where BMI was not reported by a participant). Imputation or  
52  
53  
54  
55  
56  
57  
58  
59  
60



1  
2  
3 modelling was therefore not undertaken for the occasional missing values. Details on  
4 missing data have previously been published<sup>13</sup>.  
5  
6  
7

8 All analyses were conducted using Stata IC Version 14 on Windows 7 Operating  
9 System and power calculations were undertaken using OpenEpi Version 3.  
10  
11  
12  
13  
14  
15  
16  
17  
18  
19  
20  
21  
22  
23  
24  
25  
26  
27  
28  
29  
30  
31  
32  
33  
34  
35  
36  
37  
38  
39  
40  
41  
42  
43  
44  
45  
46  
47  
48  
49  
50  
51  
52  
53  
54  
55  
56  
57  
58  
59  
60

For peer review only

## Results

Of the 898 questionnaires sent to the retired professional footballers, 572 responses were received (63.7% response). Of 2215 questionnaires sent to general population controls, 500 questionnaires were received (22.6% response) (Figure 1).

Figure 1. Selection of ex-footballer and general population controls.

The mean age of the ex-footballers was significantly younger than the controls (60 versus 64 years)) but mean BMI were comparable (Table 1).

*Table 1. Characteristics of footballer and control populations.*

|                                                                                 | Footballers<br>n=572     | Controls<br>n=500         | p-value        |
|---------------------------------------------------------------------------------|--------------------------|---------------------------|----------------|
| Age (years), mean (SD)                                                          | 60.11 (10.77)            | 64.26 (9.37)              | <0.001         |
| BMI (kg/m <sup>2</sup> ), mean (SD)                                             | 27.13 (3.40)             | 27.29 (4.48)              | 0.51           |
| Anxiety (cases), n (%)                                                          | 70 (12.01)               | 50 (10.29)                | 0.34           |
| Depression (cases), n (%)                                                       | 33 (5.66)                | 28 (5.76)                 | 0.94           |
| SF Physical Component Score, mean (SD)                                          | 45.33 (10.32)            | 77.60 (8.35)              | <0.001         |
| SF Mental Component Score, mean (SD)                                            | 48.09 (7.47)             | 71.87 (6.64)              | <0.001         |
| Optimal sleep (7-8 hours per night), n (%)                                      | 369 (64.51)              | 275 (56.70)               | 0.01           |
| Sleep Problem Index, n (%) in highest tertile of SIP                            | 186 (33.04)              | 131 (26.90)               | 0.03           |
| Positive Mood, mean (SD)                                                        | 34.75 (8.05)             | 34.97 (6.86)              | 0.63           |
| Negative Mood, mean (SD)                                                        | 16.5 (6.72)              | 14.22 (4.95)              | <0.001         |
| Indices of Multiple Deprivation (IMD) n, (%) in the lowest and highest quintile | 17 (3.51)<br>205 (42.27) | 84 (17.28)<br>199 (40.95) | <0.001<br>0.18 |

1  
2  
3 The prevalence of depression was similar in the footballers and controls (5.7% versus  
4 5.8%) but the prevalence of anxiety was slightly higher in the footballers (12.0% versus  
5 10.3%) though this was not statistically significant. Although footballers and controls  
6 shared a similar positive mood profile, footballers were significantly more likely to  
7 experience negative moods compared to the controls and to have greater problems  
8 with sleep quality ( $p<0.05$ ). When using the sleep problem index, more footballers  
9 reported problems with sleep quality ( $p<0.05$ ) and poor sleep patterns which included  
10 restlessness, shortness of breath and drowsiness. They were also more likely to have  
11 lower scores in terms of both their physical and mental health component scores as  
12 indicated by the SF-12 QoL measure.  
13  
14  
15  
16  
17  
18  
19  
20  
21

22 With respect to social deprivation, fewer footballers (3.51%) were living in areas  
23 marked as the most deprived compared to the control population (17.28%;  $p<0.001$ ).  
24  
25  
26

27 Risk factors associated with professional football following adjustment for age and BMI  
28 are presented in Table 2. Ex-footballers overall were less likely to present with any  
29 comorbidity (diabetes, hypertension, myocardial infarction, cancer and fibromyalgia),  
30 especially diabetes (61%, 95% CI, 37-76%), heart attacks (57%, 95% CI 27-74%) and  
31 hypertension (21%, 95% CI 4-35%). However, footballers reported more widespread  
32 body pain using the ACR criteria (88%, 95% CI 15-30.9%). Footballers also  
33 consumed more NSAIDs (8.6% vs. 4.2%) and OTC analgesics (24% vs. 14%) but not  
34 opioids (4% vs. 6.4%) compared to the controls.  
35  
36  
37  
38  
39  
40  
41  
42  
43  
44  
45  
46  
47  
48  
49  
50  
51  
52  
53  
54  
55  
56  
57  
58  
59  
60

*Table 2. Comparison of self-reported comorbidities, pain and medication in the ex-footballers compared to general population controls*

|                                                                                     | Footballers<br>572 | Controls<br>500 | p-value | Adjusted relative risk<br>(95% CI)<br>(for age and bmi) |
|-------------------------------------------------------------------------------------|--------------------|-----------------|---------|---------------------------------------------------------|
| Comorbidities*<br>n (%)                                                             | 178 (30.58)        | 260 (52.31)     | <0.001  | 0.74 (0.63-0.85)+                                       |
| Comorbidities** n (%)<br>(by Charlson Comorbidity<br>Index weighting** mean<br>(SD) | 0.44 (0.80)        | 0.75 (0.98)     | <0.001  | 0.71 (0.6-0.85)+                                        |
| Diabetes, n (%)                                                                     | 22 (3.77)          | 57 (11.47)      | <0.001  | 0.39 (0.24-0.63)+                                       |
| Cancer, n (%)                                                                       | 40 (6.86)          | 50 (8.58)       | 0.07    | 0.88 (0.59-1.30)                                        |
| Heart Attacks, n (%)                                                                | 18 (3.08)          | 47 (9.46)       | <0.001  | 0.43 (0.26-0.73)+                                       |
| Hypertension, n (%)                                                                 | 134 (22.98)        | 169 (34.00)     | <0.001  | 0.79 (0.65-0.96)+                                       |
| Fibromyalgia, n (%)                                                                 | 3 (0.51)           | 1 (0.20)        | 0.39    | 3.08 (0.31-31.02)                                       |
| Any Body Pain, n (%)                                                                | 454 (78.14)        | 330 (71.90)     | 0.02    | 1.09 (1.00-1.17)~                                       |
| ACR Criteria                                                                        |                    |                 |         |                                                         |
| Widespread Body Pain<br>(no KP), n (%)                                              | 48 (8.40)          | 23 (4.60)       | 0.01    | 1.88 (1.15-3.09)~                                       |
| Total Regions with<br>Pain, mean (SD)                                               | 3.13 (3.29)        | 3.44 (3.05)     | 0.14    | 0.91 (0.79-1.05)                                        |
| Back pain, n (%)                                                                    | 176 (30.18)        | 146 (29.38)     | 0.57    | 1.00 (0.76-1.32)                                        |
| Knee pain, n (%)                                                                    | 337 (57.80)        | 193 (38.83)     | <0.001  | 1.47 (1.29-1.69)~                                       |
| Pain Medication Use, n<br>(%)                                                       | 240 (41.17)        | 165 (33.20)     | 0.007   | 1.54 (1.26-1.89)~                                       |
| Opioids, n (%)                                                                      | 23 (4.03)          | 32 (6.40)       | 0.07    | 0.64 (0.37-1.10)                                        |
| NSAIDS, n (%)                                                                       | 49 (8.58)          | 21 (4.20)       | 0.004   | 1.94 (1.19-3.20)~                                       |
| OTC Analgesics, n (%)                                                               | 137 (23.99)        | 70 (14.00)      | <0.001  | 1.86 (1.44-2.43)~                                       |
| Other medications***,<br>n (%)                                                      | 18 (3.15)          | 31 (6.20)       | 0.01    | 0.50 (0.28-0.94)+                                       |

\*Diabetes, hypertension, myocardial infarction, cancer and fibromyalgia

\*\*Includes myocardial infarction, hypertension, diabetes and cancer

\*\*\* Other medications with pain relieving effects.

+ Protective factors

~ Risk factors

## Discussion

This is the first study to report the prevalence of depression, anxiety and the general health and QoL of retired professional footballers compared to a control population. The main findings are (1) the prevalence of depression and anxiety in the ex-footballers is comparable to men in the general population; (2) ex-footballers have a lower QoL as indicated by the SF-12 physical and mental component scores; (3) they are more likely to present with widespread body pain and use pain medication particularly OTC analgesics and NSAIDs; and (4) they are less likely to present with comorbidities, in particular diabetes, heart attacks and hypertension.

The study reported a prevalence of depression (6%) and anxiety (12%) in ex-footballers which is lower than the 25-43% reported by Goutterborge<sup>5</sup>. This discrepancy could result from smaller sample sizes (range of 70-149 ex-players), sample selection and status of footballers (current professional footballers from five different European countries), and the assessment tool used to determine depression and anxiety (12-item general health questionnaire (GHQ-12)) in that study. In a further study<sup>32</sup>, specifically investigating ex-footballers, estimated a 39% prevalence of both anxiety and depression using the GHQ-12. A number of self-report assessment tools have been used in epidemiological research to detect depression and anxiety<sup>32-34</sup>. While the GHQ-12 has demonstrated excellent validity in detecting depression in the general population<sup>35</sup>, the HADS has demonstrated better sensitivity and specificity in detecting depression. Indeed, the choice of assessment tool should be balanced with feasibility of approach, cost effectiveness, as well as the administration and scoring times involved<sup>32</sup>. Additionally, none of the previous studies in ex-footballers presented results for an adequately matched comparison group of non-professional footballers. The results of this study accord with a comparative meta-analysis in high-performance athletes and non-athletes showing similar levels of depression across the groups<sup>4</sup>. Elite athletes are sometimes supported with psychological training as part of their sport programs and may have developed mental toughness and resilience in order to cope with stress, anxiety and even depression<sup>36-39</sup>. There is a noted stigma about reporting mental health symptoms both in ex-footballer and general population samples which may result in choosing to suppress, ignore and not seek further help when needed<sup>6,35,40</sup>. Furthermore, when compared to another general population study, the

1  
2  
3 prevalence of depression (7-9%) and anxiety (8-14%) in general population men aged  
4 40-65 years is comparable to the controls in this study, suggesting that this East  
5 Midlands control population are representative of the British general population and  
6 are a valid control group<sup>41</sup>.  
7  
8  
9

10  
11 In terms of QoL, the ex-footballers had significantly lower scores in both physical and  
12 mental components compared to controls. It has been postulated that this negative  
13 effect on QoL is a consequence of reporting more specific joint pain (e.g. knee pain)  
14 and more overall body pain<sup>13,42</sup>. Although both the ex-footballers and the control  
15 population indicated pain in one region on a body pain manikin (78% vs. 72%), after  
16 adjustment for age and BMI, ex-footballers are 88% more likely to present with  
17 widespread body pain when using the more stringent ACR criteria compared to the  
18 control group. Widespread pain can have significant, deleterious effects on physical  
19 and mental health and well-being<sup>43</sup> including implications on sleep disturbance and  
20 mood. Longitudinal cohort studies have shown that insomnia and sleep disturbances  
21 significantly increase the risk of chronic pain in pain-free individuals at baseline whilst  
22 pain is not a strong predictor of insomnia<sup>44</sup>. As a result of the cross-sectional nature  
23 of this study, we cannot ascertain causation between pain and sleep. However, the  
24 results in ex-footballers show that whilst sleep duration may be marginally better (64.5  
25 vs. 56.7% for 7-8 hours of sleep), the quality of sleep was more disturbed in terms of  
26 restlessness, feeling tense or drowsy compared to controls. The effect on mood is  
27 also notable with ex-footballers more likely to present with negative feelings and  
28 emotions such as distress, irritability, fear and nervousness compared to controls. The  
29 association of emotional distress and pain-related fear on patients with chronic pain  
30 has been established in previous population-based studies<sup>45-48</sup>. Widespread body pain  
31 is a key feature of fibromyalgia, but the cross-sectional nature of this study does not  
32 allow investigation of temporal trends<sup>47</sup>. A further indication of higher pain levels in ex-  
33 footballers is the significantly higher use of analgesics (41%) compared to controls  
34 (33%) and in particular NSAIDs (8.58% vs. 4.20%) and OTC analgesics (24% vs.  
35 14%). The use of analgesics presumably reflects compromised musculoskeletal  
36 health, whereas in terms of systemic general health the footballers reported  
37 significantly less diabetes, cancer, heart attacks and hypertension compared to  
38 controls. These results accord with previous studies of elite male athletes and ex-  
39 footballers with lower risk of ischaemic heart disease and diabetes, but an elevated  
40  
41  
42  
43  
44  
45  
46  
47  
48  
49  
50  
51  
52  
53  
54  
55  
56  
57  
58  
59  
60

1  
2  
3 risk of musculoskeletal conditions particularly lower limb osteoarthritis<sup>13,49</sup>.  
4 Interestingly, ex-footballers reported significantly lower use of drugs such as  
5 citalopram, diazepam, and temazepam which are used primarily in the treatment of  
6 depression and anxiety respectively. Although the study was not powered for  
7 medication outcomes, the use of medication in the footballer cohort was primarily for  
8 pain relief rather than relief for mental health problems. In fact, ex-footballers may have  
9 developed a certain resilience and mental toughness due to being an elite athlete  
10 which may be a protective factor for long term mental ill-health<sup>4,37,49,50</sup>.  
11  
12  
13  
14  
15  
16  
17  
18

19 There are several caveats to this study. Firstly, this was a postal questionnaire study  
20 focused on pain and osteoarthritis in ex-footballers<sup>13</sup>, and a community sample<sup>32</sup>, so  
21 may be subject to response bias (those with pain are more likely to respond). However,  
22 this would not explain the between group differences. Secondly, the response rate  
23 was higher in the ex-footballer cohort than the controls (63.7% vs. 22.6%) and the low  
24 response rate in controls questions the representativeness of the sample. Thirdly, the  
25 comorbidities and medications were self-reported, and due to logistical reasons  
26 relating to questionnaire length, data on established associated risk factors for  
27 depression and anxiety such as smoking status, alcohol consumption, educational,  
28 marital and economic status<sup>51-54</sup> were not available. Also, although the study did not  
29 find any differences between ex-footballers and controls in terms of mental health it  
30 would have been interesting to examine mental toughness, resilience, optimism and  
31 general pain coping mechanisms between the two populations. Future epidemiological  
32 research on this topic should explore these relationships in more detail. Also, our use  
33 of HADS may have been a limitation as this scale may be measuring only the  
34 symptoms of depression or anxiety as opposed to producing a more definitive  
35 diagnoses that could be elicited with the use of alternatives such as the DSM-5.  
36 Furthermore,, this study did not specifically measure two aspects of quality of life:  
37 physical health via current physical activity levels, and, social relations via personal  
38 relationships or available social support. These data would have given us insight into  
39 current physical fitness levels, physical limitations as a consequence of  
40 musculoskeletal conditions, and whether there was adequate psychosocial support in  
41 an individual's life. These form some of the core tenets of a healthy quality of life<sup>53</sup> and  
42 may have offered robust data on previously reported anecdotal effects of bankruptcy,  
43 divorce or trauma particularly in the ex-footballers<sup>55</sup>. Finally, we did not examine the  
44  
45  
46  
47  
48  
49  
50  
51  
52  
53  
54  
55  
56  
57  
58  
59  
60

1  
2  
3 effects of repetitive heading of footballs and risk of head injury and concussion in  
4 professional footballers, and the possible long-term health impact that this could have  
5 on neuro-cognition and mental health. A future study is planned to address this issue.  
6  
7  
8  
9

10 In summary, this is the largest study on anxiety, depression and quality of life in ex-  
11 professional footballers and the first to include an age-adjusted general population  
12 comparison sample. The results show that ex-footballers are just as likely to have  
13 anxiety and depression as controls, but they have lower QoL in terms of both physical  
14 and mental composite scores. However, despite reporting more widespread body pain  
15 and use of analgesics, they are less likely to report cardiovascular disease or diabetes.  
16 The results suggest that healthcare providers, club management and football  
17 organisations should be focused on improving musculoskeletal pain management  
18 strategies in ex-footballers. Further study on the potential benefits of professional sport  
19 on pain coping and resilience mechanisms which may be protective factors for long  
20 term psychological consequences such as depression and anxiety would benefit the  
21 large numbers of ex-professional footballers both nationally and internationally. It  
22 would also be valuable to explore the effects of neurocognitive functioning on mental  
23 health in ex-footballers and capture the granularity around type, severity and  
24 frequencies of injuries such as concussion and the subsequent long-term health  
25 impact.  
26  
27  
28  
29  
30  
31  
32  
33  
34  
35  
36  
37  
38  
39  
40  
41  
42  
43  
44  
45  
46  
47  
48  
49  
50  
51  
52  
53  
54  
55  
56  
57  
58  
59  
60



## References:

1. FIFA Big Count 2006. FIFA Facts, 2016. [http://www.fifa.com/mm/document/fifafacts/bcoffsurv/bigcount.statspackage\\_7024.pdf](http://www.fifa.com/mm/document/fifafacts/bcoffsurv/bigcount.statspackage_7024.pdf) ( Accessed 10 Oct 2016).
2. Gulliver A, Griffiths KM, Mackinnon A, et al. The mental health of Australian elite athletes. *Journal of science and medicine in sport* 2015;18(3):255-61. doi: 10.1016/j.jsams.2014.04.006 [published Online First: 2014/06/03]
3. Ekstrand J, Hagglund M, Walden M. Injury incidence and injury patterns in professional football: the UEFA injury study. *British journal of sports medicine* 2011;45(7):553-8. doi: 10.1136/bjsm.2009.060582 [published Online First: 2009/06/26]
4. Gorczynski PF, Coyle M, Gibson K. Depressive symptoms in high-performance athletes and non-athletes: a comparative meta-analysis. *British journal of sports medicine* 2017;51(18):1348-54. doi: 10.1136/bjsports-2016-096455 [published Online First: 2017/03/04]
5. Gouttebauge V, Backx FJ, Aoki H, et al. Symptoms of Common Mental Disorders in Professional Football (Soccer) Across Five European Countries. *Journal of sports science & medicine* 2015;14(4):811-8. [published Online First: 2015/12/15]
6. Rice SM, Purcell R, De Silva S, et al. The Mental Health of Elite Athletes: A Narrative Systematic Review. *Sports Medicine* 2016;46(9):1333-53. doi: 10.1007/s40279-016-0492-2
7. Turner AP, Barlow JH, Heathcote-Elliott C. Long term health impact of playing professional football in the United Kingdom. 2000;34(5):332-36. doi: 10.1136/bjsm.34.5.332 %J British Journal of Sports Medicine
8. Turner A, Barlow J, Ilbery B. Play Hurt, Live Hurt: Living with and Managing Osteoarthritis from the Perspective of Ex-professional Footballers. *Journal of health psychology* 2002;7(3):285-301. doi: 10.1177/1359105302007003222 [published Online First: 2002/05/01]
9. Armstrong S, Oomen-Early J. Social connectedness, self-esteem, and depression symptomatology among collegiate athletes versus nonathletes. *Journal of American college health : J of ACH* 2009;57(5):521-6. doi: 10.3200/jach.57.5.521-526 [published Online First: 2009/03/04]
10. Spengler A, Schneider G, Schröder E. Depressivität—Screening und Vorkommen in der sportmedizinischen Praxis. *Dtsch Z Sportmed* 2013;64:65–8.
11. Junge A, Feddermann-Demont N. Prevalence of depression and anxiety in top-level male and female football players. 2016;2(1):e000087. doi: 10.1136/bmjsem-2015-000087 %J BMJ Open Sport & Exercise Medicine

- 1  
2  
3 12. Prinz B, Dvořák J, Junge A. Symptoms and risk factors of depression during and after the  
4 football career of elite female players. 2016;2(1):e000124. doi: 10.1136/bmjsem-2016-000124  
5 %J BMJ Open Sport & Exercise Medicine  
6  
7 13. Fernandes GS, Parekh SM, Moses J, et al. Prevalence of knee pain, radiographic  
8 osteoarthritis and arthroplasty in retired professional footballers compared with men in the  
9 general population: a cross-sectional study. *British journal of sports medicine*  
10 2018;52(10):678-83. doi: 10.1136/bjsports-2017-097503 [published Online First: 2017/11/05]  
11  
12 14. Mykletun A, Stordal E, Dahl AA. Hospital Anxiety and Depression (HAD) scale: factor  
13 structure, item analyses and internal consistency in a large population. *The British journal of*  
14 *psychiatry : the journal of mental science* 2001;179:540-4.  
15  
16 15. Crawford JR, Henry JD, Crombie C, et al. Normative data for the HADS from a large non-  
17 clinical sample. *The British journal of clinical psychology* 2001;40(Pt 4):429-34. [published  
18 Online First: 2002/01/05]  
19  
20 16. Hinz, A., & Brahler, E. (2011). Normative values for the hospital anxiety and depression scale  
21 (HADS) in the general German population. *J Psychosom Res*, 71(2), 74-78.  
22 doi:10.1016/j.jpsychores.2011.01.005  
23  
24 17. Olsson, I., Mykletun, A., & Dahl, A. A. (2005). The Hospital Anxiety and Depression Rating  
25 Scale: a cross-sectional study of psychometrics and case finding abilities in general practice.  
26 *BMC Psychiatry*, 5, 46. doi:10.1186/1471-244x-5-46  
27  
28 18. Stern, A. F. (2014). The Hospital Anxiety and Depression Scale. *Occupational Medicine*,  
29 64(5), 393-394. doi:10.1093/occmed/kqu024 %J Occupational Medicine  
30  
31  
32  
33  
34  
35  
36  
37  
38  
39  
40  
41  
42  
43  
44  
45  
46  
47  
48  
49  
50  
51  
52  
53  
54  
55  
56  
57  
58  
59  
60

19. Jenkinson C, Layte R, Jenkinson D, et al. A shorter form health survey: can the SF-12 replicate results from the SF-36 in longitudinal studies? *Journal of public health medicine* 1997;19(2):179-86. [published Online First: 1997/06/01]
20. B. Gandek, J.E. Ware, N.K. Aaronson, et al. Cross-validation of item selection and scoring for the SF-12 Health Survey in nine countries: results from the IQOLA Project. *International Quality of Life Assessment J Clin Epidemiol*, 51 1998, pp. 1171-1178
21. Ware JE, Jr., Gandek B, Kosinski M, et al. The equivalence of SF-36 summary health scores estimated using standard and country-specific algorithms in 10 countries: results from the IQOLA Project. *International Quality of Life Assessment. Journal of clinical epidemiology* 1998;51(11):1167-70. [published Online First: 1998/11/17]
22. Jenkinson C, Layte R, Jenkinson D, et al. A shorter form health survey: can the SF-12 replicate results from the SF-36 in longitudinal studies? *Journal of public health medicine* 1997;19(2):179-86. [published Online First: 1997/06/01]
23. Hays, R. D., & Stewart, A. L. Sleep measures. In A. L. Stewart & J. E. Ware (eds.), *Measuring functioning and well-being: The Medical Outcomes Study approach*, 1992. (pp. 235-259), Durham, NC: Duke University Press.
24. Allen RP, Kosinski M, Hill-Zabala CE, et al. Psychometric evaluation and tests of validity of the Medical Outcomes Study 12-item Sleep Scale (MOS sleep). *Sleep medicine* 2009;10(5):531-9. doi: 10.1016/j.sleep.2008.06.003 [published Online First: 2008/09/23]
25. Williams DA, Arnold LM. Measures of fibromyalgia: Fibromyalgia Impact Questionnaire (FIQ), Brief Pain Inventory (BPI), Multidimensional Fatigue Inventory (MFI-20), Medical Outcomes Study (MOS) Sleep Scale, and Multiple Ability Self-Report Questionnaire (MASQ). *Arthritis care & research* 2011;63 Suppl 11:S86-97. doi: 10.1002/acr.20531 [published Online First: 2012/05/25]
26. Watson D, Clark LA, Tellegen A. Development and validation of brief measures of positive and negative affect: the PANAS scales. *Journal of personality and social psychology* 1988;54(6):1063-70. [published Online First: 1988/06/01]
27. Clark LA, Watson D. Tripartite model of anxiety and depression: psychometric evidence and taxonomic implications. *Journal of abnormal psychology* 1991;100(3):316-36. [published Online First: 1991/08/01]
28. Crawford JR, Henry JD. The positive and negative affect schedule (PANAS): construct validity, measurement properties and normative data in a large non-clinical sample. *The British journal of clinical psychology* 2004;43(Pt 3):245-65. doi: 10.1348/0144665031752934 [published Online First: 2004/08/31]
29. English Indices of Deprivation, 2015. Available from. <https://www.gov.uk/government/statistics/english-indices-of-deprivation-2015> [Accessed 10th May 2018]
30. Fernandes GS, Sarmanova A, Warner S, et al. Knee pain and related health in the community study (KPIC): a cohort study protocol. *BMC musculoskeletal disorders* 2017;18(1):404. doi: 10.1186/s12891-017-1761-4
31. Hunt IM, Silman AJ, Benjamin S, et al. The prevalence and associated features of chronic widespread pain in the community using the 'Manchester' definition of chronic widespread pain. *Rheumatology (Oxford, England)* 1999;38(3):275-9. [published Online First: 1999/05/18]
32. Goutteborge V, Aoki H, Kerkhoffs GM. Prevalence and determinants of symptoms related to mental disorders in retired male professional footballers. *The Journal of sports medicine and physical fitness* 2016;56(5):648-54. [published Online First: 2016/06/11]

- 1  
2  
3  
4 33. Williams JW, Jr., Pignone M, Ramirez G, et al. Identifying depression in primary care: a  
5 literature synthesis of case-finding instruments. *General hospital psychiatry* 2002;24(4):225-  
6 37. [published Online First: 2002/07/09]  
7  
8 34. J. ODP, E. FA, Liam S, et al. Factors associated with depression in a representative sample  
9 of 14 217 people aged 75 and over in the United Kingdom: results from the MRC trial of  
10 assessment and management of older people in the community. *International Journal of*  
11 *Geriatric Psychiatry* 2003;18(7):623-30. doi:10.1002/gps.896  
12  
13 35. Office for National Statistics. Measuring National Well-being: Quality of Life in the UK, 2018.  
14 Available from: [www.ons.gov.uk/](http://www.ons.gov.uk/peoplepopulationandcommunity/wellbeing/articles/measuringnationalwellbeing/qualityoflifeintheuk2018)  
15 [peoplepopulationandcommunity/wellbeing/articles/measuringnationalwellbeing/qualityoflifeinthe](http://www.ons.gov.uk/peoplepopulationandcommunity/wellbeing/articles/measuringnationalwellbeing/qualityoflifeintheuk2018)  
16 [uk2018](http://www.ons.gov.uk/peoplepopulationandcommunity/wellbeing/articles/measuringnationalwellbeing/qualityoflifeintheuk2018) [Accessed 5<sup>th</sup> May 2018]  
17  
18 36. Lundin A, Hallgren M, Theobald H, et al. Validity of the 12-item version of the General Health  
19 Questionnaire in detecting depression in the general population. *Public health* 2016;136:66-  
20 74. doi: 10.1016/j.puhe.2016.03.005 [published Online First: 2016/04/05]  
21  
22 37. Jones G, Hanton S, Connaughton D. A Framework of Mental Toughness in the World's Best  
23 Performers. *The Sport Psychologist* 2007;21(2):243-64. doi: 10.1123/tsp.21.2.243  
24  
25 38. Zeiger JS, Zeiger RS. Mental toughness latent profiles in endurance athletes. *PLoS one*  
26 2018;13(2):e0193071. doi: 10.1371/journal.pone.0193071 [published Online First:  
27 2018/02/24]  
28  
29 39. Tham, E.K.. and Weigand, D.A. Mental Toughness Strategies of the World's Greatest  
30 Athletes: the Ultimate Guidebook for developing your medal-winning potential in sport. 2010.  
31 USA: Health Sciences Academy.  
32  
33 40. Bamford, S, Holley-Moore, G and Watson, J. New Perspective and approaches to  
34 understanding dementia and stigma. Available from:  
35 [http://www.ilcuk.org.uk/index.php/publications/publication\\_details/new\\_perspectives\\_and\\_app](http://www.ilcuk.org.uk/index.php/publications/publication_details/new_perspectives_and_approaches_to_understanding_dementia_and_stigma)  
36 [roaches\\_to\\_understanding\\_dementia\\_and\\_stigma](http://www.ilcuk.org.uk/index.php/publications/publication_details/new_perspectives_and_approaches_to_understanding_dementia_and_stigma) [Accessed 1<sup>ST</sup> May 2017]  
37  
38 41. Breeman S, Cotton S, Fielding S, et al. Normative data for the Hospital Anxiety and  
39 Depression Scale. *Quality of Life Research* 2015;24(2):391-98. doi: 10.1007/s11136-014-  
40 0763-z  
41  
42 42. Neville A, Peleg R, Singer Y, et al. Chronic pain: a population-based study. *The Israel Medical*  
43 *Association journal : IMAJ* 2008;10(10):676-80. [published Online First: 2008/11/18]  
44  
45 43. McCarberg BH, Nicholson BD, Todd KH, et al. The impact of pain on quality of life and the  
46 unmet needs of pain management: results from pain sufferers and physicians participating in  
47 an Internet survey. *American journal of therapeutics* 2008;15(4):312-20. doi:  
48 10.1097/MJT.0b013e31818164f2 [published Online First: 2008/07/23]  
49  
50 44. Finan, P. H., Goodin, B. R., & Smith, M. T. The association of sleep and pain: An update and  
51 a path forward. *The Journal of Pain, 2013. Official Journal of the American Pain*  
52 *Society, 14*(12), 1539–1552. <http://doi.org/10.1016/j.jpain.2013.08.007>  
53  
54 45. McBeth J, Macfarlane GJ, Benjamin S, et al. Features of somatization predict the onset of  
55 chronic widespread pain: results of a large population-based study. *Arthritis and rheumatism*  
56 2001;44(4):940-6. doi: 10.1002/1529-0131(200104)44:4<940::aid-anr151>3.0.co;2-s  
57 [published Online First: 2001/04/24]  
58  
59 46. Sullivan MJ, Thorn B, Haythornthwaite JA, et al. Theoretical perspectives on the relation  
60 between catastrophizing and pain. *The Clinical journal of pain* 2001;17(1):52-64. [published  
Online First: 2001/04/06]

- 1  
2  
3  
4 47. Larsson, C., Ekvall Hansson, E., Sundquist, K., & Jakobsson, U. Impact of pain  
5 characteristics and fear-avoidance beliefs on physical activity levels among older adults with  
6 chronic pain: a population-based, longitudinal study. *BMC Geriatrics*, 2016. 16, 50.  
7 <http://doi.org/10.1186/s12877-016-0224-3>  
8
- 9 48. Gupta A, Silman AJ, Ray D, et al. The role of psychosocial factors in predicting the onset of  
10 chronic widespread pain: results from a prospective population-based study. *Rheumatology*  
11 (*Oxford, England*) 2007;46(4):666-71. doi: 10.1093/rheumatology/kel363 [published Online  
12 First: 2006/11/07]
- 13 49. Sarna S, Kaprio J, Kujala UM, et al. Health status of former elite athletes. The Finnish  
14 experience. *Aging (Milan, Italy)* 1997;9(1-2):35-41. [published Online First: 1997/02/01]  
15
- 16 50. Nicholls, A.R. , Polman, R.C.J. , Levy, A.R. , , Backhouse, S.H. Mental toughness, optimism,  
17 pessimism, and coping among athletes. *Personality and Individual Differences*,  
18 2008. 44, 1182–1192  
19
- 20 51. Beekman AT, Deeg DJ, van Tilburg T, et al. Major and minor depression in later life: a study  
21 of prevalence and risk factors. *Journal of affective disorders* 1995;36(1-2):65-75. [published  
22 Online First: 1995/12/24]  
23
- 24 52. Martin G. Cole, Nandini Dendukuri. Risk Factors for Depression Among Elderly Community  
25 Subjects: A Systematic Review and Meta-Analysis. *American Journal of Psychiatry*  
26 2003;160(6):1147-56. doi: 10.1176/appi.ajp.160.6.1147  
27
- 28 53. Wolanin A, Gross M, Hong E. Depression in athletes: prevalence and risk factors. *Current*  
29 *sports medicine reports* 2015;14(1):56-60. doi: 10.1249/jsr.000000000000123 [published  
30 Online First: 2015/01/13]  
31
- 32 54. World Health Organisation (WHO) 2018. Measuring Quality of Life. Available from:  
33 <http://www.who.int/healthinfo/survey/whoqol-qualityoflife/en/index4.html> [Accessed 2nd Feb  
34 2018]  
35
- 36 55. Gernon, A. 2016. Retired: What Happens to Footballers When the Game's Up. Durrington:  
37 Pitch Publishing.  
38  
39  
40  
41  
42  
43  
44  
45  
46  
47  
48  
49  
50  
51  
52  
53  
54  
55  
56  
57  
58  
59  
60

## Acknowledgements and Affiliations:

### Acknowledgements

The study was funded by the Arthritis Research UK Centre for Sports, Exercise and Osteoarthritis (Grant 20194). The study was also funded by FIFA's Medical Assessment and Research Centre as well as the Professional Footballers' Association.

We are grateful to the Arthritis Research UK Pain Centre in Nottingham for access to KPIC participants. We would like to acknowledge the invaluable assistance and advice from Dr Charlotte Cowie (SPIRE), Richard Jobson, John Bramhall and Ben Simpson in the administration of players' database with the support of the Professional Football Association. We would also like to thank the members of our Patient and Public Involvement group for their time and advice with designing the questionnaire and being involved and helping with every stage of the research process.

### Affiliations

None of the study sponsors/funders were involved in the study design, in the collection, analysis and interpretation of data, in the writing of the report and in the decision to submit the article for publication.

All researchers were independent from funders.

All authors had full access to all the data in the study and take responsibility for the integrity of the data and the accuracy of the data analysis.

review only

## Declarations:

### Consent:

The study was approved by Nottingham University Hospitals NHS Trust and the Nottingham Research Ethics Committee 1 (Refs 14/EM/0045 & 14/EM/0015) and registered (clinicaltrials.gov portal: NCT02098044 & NCT02098070).

All participants offered consent by responding to the postal questionnaire survey and written informed consent prior to radiographic assessment at the SPIRE Hospitals and the Nottingham City Hospital.

### Contributor's statement:

GSF designed the data collection tools, wrote the statistical plan, implemented the study design (conducted the study), conducted cleaning and analysis of the data, wrote the initial drafts of the paper and subsequently revised the paper after feedback from the team. SMP designed the data collection tools, wrote the statistical plan, implemented the study design (conducted the study), conducted cleaning and analysis of the data, and drafted and revised the paper. JPM conducted cleaning and analysis of the data, and drafted and revised the paper. CWF conceptualised the study and drafted and revised the paper. BS conceptualised the study and drafted and revised the paper. MEB monitored data collection and drafted and revised the paper. WZ conceptualised and designed the study and data collection tools, wrote the statistical plan, monitored data collection and drafted and revised the paper. MD conceptualised and designed the study and data collection tools, monitored data collection and drafted and revised the paper. He is guarantor.

### Conflict of Interest Disclosures:

All authors have completed the ICMJE uniform disclosure form at [www.icmje.org/coi\\_disclosure.pdf](http://www.icmje.org/coi_disclosure.pdf) and declare: financial support (research grant) for the submitted work from FIFA Medical Assessment and Research Centre, other from Arthritis Research UK Centre for Sports, Exercise and Osteoarthritis (Grant Reference 20194); research grant from the Professional Footballers' Association and financial support from the SPIRE Healthcare Group at the Football Association (St George's Park); CF did paid consultancy for FIFA Medical Assessment and Research Centre, the Football Association and the Premier League in the past three years and has received personal fees from these bodies outside the remit of the submitted work; MD received research funding by AstraZeneca, Nordic Biosciences, Roche, outside the submitted work; Dr. Zhang reports grants from Arthritis Research UK, grants from Arthritis Research UK, during the conduct of the study; other from AstraZeneca, other from Daiichi Sankyo, other from Biobarica, other from Hisun, outside the submitted work; no financial relationships with any organisation that might have an interest in the submitted work in the previous three years for any other authors; no other relationships or activities that could appear to have influenced the submitted work.

### Copyright / license for publication

"The Corresponding Author has the right to grant on behalf of all authors and does grant on behalf of all authors, a worldwide license to the Publishers and its licensees in perpetuity, in all forms, formats and media (whether known now or created in the future), to i) publish, reproduce, distribute, display and store the Contribution, ii) translate the Contribution into other languages, create adaptations, reprints, include within collections and create summaries, extracts and/or, abstracts of the Contribution,

1  
2  
3 iii) create any other derivative work(s) based on the Contribution, iv) to exploit all  
4 subsidiary rights in the Contribution, v) the inclusion of electronic links from the  
5 Contribution to third party material where-ever it may be located; and, vi) license any  
6 third party to do any or all of the above.”  
7  
8

9 Data Sharing: No additional data available.

10  
11 Transparency Declaration: Professor Michael Doherty (MD) affirms that the  
12 manuscript is an honest, accurate, and transparent account of the study being  
13 reported and that no important aspects of the study have been omitted.  
14  
15  
16  
17  
18  
19  
20  
21  
22  
23  
24  
25  
26  
27  
28  
29  
30  
31  
32  
33  
34  
35  
36  
37  
38  
39  
40  
41  
42  
43  
44  
45  
46  
47  
48  
49  
50  
51  
52  
53  
54  
55  
56  
57  
58  
59  
60

For peer review only



1  
2  
3  
4  
5  
6  
7  
8  
9  
10  
11  
12  
13  
14  
15  
16  
17  
18  
19  
20  
21  
22  
23  
24  
25  
26  
27  
28  
29  
30  
31  
32  
33  
34  
35  
36  
37  
38  
39  
40  
41  
42  
43  
44  
45  
46  
47  
48  
49  
50  
51  
52  
53  
54  
55  
56  
57  
58  
59  
60

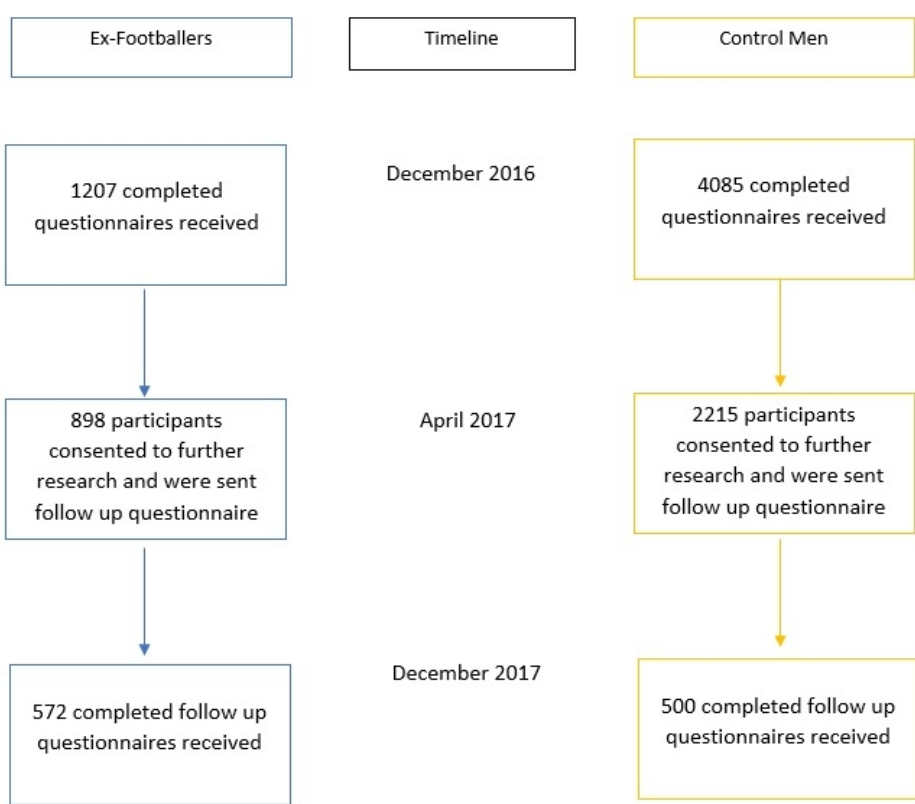

Figure 1 Selection of ex-footballer and general population controls.

58x51mm (300 x 300 DPI)

**STROBE 2007 (v4) checklist of items to be included in reports of observational studies in epidemiology\***  
**Checklist for cohort, case-control, and cross-sectional studies (combined)**

| Section/Topic             | Item # | Recommendation                                                                                                                                                                                                                                                                                                                                                                                                                                                         | Reported on page # |
|---------------------------|--------|------------------------------------------------------------------------------------------------------------------------------------------------------------------------------------------------------------------------------------------------------------------------------------------------------------------------------------------------------------------------------------------------------------------------------------------------------------------------|--------------------|
| Title and abstract        | 1      | (a) Indicate the study's design with a commonly used term in the title or the abstract                                                                                                                                                                                                                                                                                                                                                                                 | Page 1 and 2       |
|                           |        | (b) Provide in the abstract an informative and balanced summary of what was done and what was found                                                                                                                                                                                                                                                                                                                                                                    | Page 2             |
| <b>Introduction</b>       |        |                                                                                                                                                                                                                                                                                                                                                                                                                                                                        |                    |
| Background/rationale      | 2      | Explain the scientific background and rationale for the investigation being reported                                                                                                                                                                                                                                                                                                                                                                                   | Page 4 and 5       |
| Objectives                | 3      | State specific objectives, including any pre-specified hypotheses                                                                                                                                                                                                                                                                                                                                                                                                      | Page 5             |
| <b>Methods</b>            |        |                                                                                                                                                                                                                                                                                                                                                                                                                                                                        |                    |
| Study design              | 4      | Present key elements of study design early in the paper                                                                                                                                                                                                                                                                                                                                                                                                                | Page 6             |
| Setting                   | 5      | Describe the setting, locations, and relevant dates, including periods of recruitment, exposure, follow-up, and data collection                                                                                                                                                                                                                                                                                                                                        | Pages 6-9          |
| Participants              | 6      | (a) <i>Cohort study</i> —Give the eligibility criteria, and the sources and methods of selection of participants. Describe methods of follow-up<br><i>Case-control study</i> —Give the eligibility criteria, and the sources and methods of case ascertainment and control selection. Give the rationale for the choice of cases and controls<br><i>Cross-sectional study</i> —Give the eligibility criteria, and the sources and methods of selection of participants | Page 6             |
|                           |        | (b) <i>Cohort study</i> —For matched studies, give matching criteria and number of exposed and unexposed<br><i>Case-control study</i> —For matched studies, give matching criteria and the number of controls per case                                                                                                                                                                                                                                                 | Page 10-11         |
| Variables                 | 7      | Clearly define all outcomes, exposures, predictors, potential confounders, and effect modifiers. Give diagnostic criteria, if applicable                                                                                                                                                                                                                                                                                                                               | Page 7-9           |
| Data sources/ measurement | 8*     | For each variable of interest, give sources of data and details of methods of assessment (measurement). Describe comparability of assessment methods if there is more than one group                                                                                                                                                                                                                                                                                   | Page 7-9           |
| Bias                      | 9      | Describe any efforts to address potential sources of bias                                                                                                                                                                                                                                                                                                                                                                                                              | Page 9 and page 16 |
| Study size                | 10     | Explain how the study size was arrived at                                                                                                                                                                                                                                                                                                                                                                                                                              | Page 10, 11        |
| Quantitative variables    | 11     | Explain how quantitative variables were handled in the analyses. If applicable, describe which groupings were chosen and why                                                                                                                                                                                                                                                                                                                                           | Page 7-9           |
| Statistical methods       | 12     | (a) Describe all statistical methods, including those used to control for confounding                                                                                                                                                                                                                                                                                                                                                                                  | Page 10            |
|                           |        | (b) Describe any methods used to examine subgroups and interactions                                                                                                                                                                                                                                                                                                                                                                                                    | n/a                |
|                           |        | (c) Explain how missing data were addressed                                                                                                                                                                                                                                                                                                                                                                                                                            | Page 10            |
|                           |        | (d) <i>Cohort study</i> —If applicable, explain how loss to follow-up was addressed<br><i>Case-control study</i> —If applicable, explain how matching of cases and controls was addressed                                                                                                                                                                                                                                                                              | n/a                |

|                          |     |                                                                                                                                                                                                              |                           |
|--------------------------|-----|--------------------------------------------------------------------------------------------------------------------------------------------------------------------------------------------------------------|---------------------------|
|                          |     | <i>Cross-sectional study</i> —If applicable, describe analytical methods taking account of sampling strategy                                                                                                 |                           |
|                          |     | (e) Describe any sensitivity analyses                                                                                                                                                                        | none                      |
| <b>Results</b>           |     |                                                                                                                                                                                                              |                           |
| Participants             | 13* | (a) Report numbers of individuals at each stage of study—eg numbers potentially eligible, examined for eligibility, confirmed eligible, included in the study, completing follow-up, and analysed            | Flow chart figure page 11 |
|                          |     | (b) Give reasons for non-participation at each stage                                                                                                                                                         |                           |
|                          |     | (c) Consider use of a flow diagram                                                                                                                                                                           | Figure 1                  |
| Descriptive data         | 14* | (a) Give characteristics of study participants (eg demographic, clinical, social) and information on exposures and potential confounders                                                                     | Page 11                   |
|                          |     | (b) Indicate number of participants with missing data for each variable of interest                                                                                                                          | Page 10                   |
|                          |     | (c) <i>Cohort study</i> —Summarise follow-up time (eg, average and total amount)                                                                                                                             |                           |
| Outcome data             | 15* | <i>Cohort study</i> —Report numbers of outcome events or summary measures over time                                                                                                                          |                           |
|                          |     | <i>Case-control study</i> —Report numbers in each exposure category, or summary measures of exposure                                                                                                         | Page 11-13                |
|                          |     | <i>Cross-sectional study</i> —Report numbers of outcome events or summary measures                                                                                                                           |                           |
| Main results             | 16  | (a) Give unadjusted estimates and, if applicable, confounder-adjusted estimates and their precision (eg, 95% confidence interval). Make clear which confounders were adjusted for and why they were included | Page 12-13                |
|                          |     | (b) Report category boundaries when continuous variables were categorized                                                                                                                                    |                           |
|                          |     | (c) If relevant, consider translating estimates of relative risk into absolute risk for a meaningful time period                                                                                             |                           |
| Other analyses           | 17  | Report other analyses done—eg analyses of subgroups and interactions, and sensitivity analyses                                                                                                               |                           |
| <b>Discussion</b>        |     |                                                                                                                                                                                                              |                           |
| Key results              | 18  | Summarise key results with reference to study objectives                                                                                                                                                     | Page 14                   |
| Limitations              | 19  | Discuss limitations of the study, taking into account sources of potential bias or imprecision. Discuss both direction and magnitude of any potential bias                                                   | Page 14-16                |
| Interpretation           | 20  | Give a cautious overall interpretation of results considering objectives, limitations, multiplicity of analyses, results from similar studies, and other relevant evidence                                   | Page 14-16                |
| Generalisability         | 21  | Discuss the generalisability (external validity) of the study results                                                                                                                                        | Page 17                   |
| <b>Other information</b> |     |                                                                                                                                                                                                              |                           |
| Funding                  | 22  | Give the source of funding and the role of the funders for the present study and, if applicable, for the original study on which the present article is based                                                | Page 22                   |

\*Give information separately for cases and controls in case-control studies and, if applicable, for exposed and unexposed groups in cohort and cross-sectional studies.

**Note:** An Explanation and Elaboration article discusses each checklist item and gives methodological background and published examples of transparent reporting. The STROBE checklist is best used in conjunction with this article (freely available on the Web sites of PLoS Medicine at <http://www.plosmedicine.org/>, Annals of Internal Medicine at <http://www.annals.org/>, and Epidemiology at <http://www.epidem.com/>). Information on the STROBE Initiative is available at [www.strobe-statement.org](http://www.strobe-statement.org).

# BMJ Open

## Depressive symptoms and the General Health of Retired Professional Footballers compared to the General Population in the United Kingdom: A Case Control Study

|                                 |                                                                                                                                                                                                                                                                                                                                                                                                                                                                                                                                                                                                                                                                              |
|---------------------------------|------------------------------------------------------------------------------------------------------------------------------------------------------------------------------------------------------------------------------------------------------------------------------------------------------------------------------------------------------------------------------------------------------------------------------------------------------------------------------------------------------------------------------------------------------------------------------------------------------------------------------------------------------------------------------|
| Journal:                        | <i>BMJ Open</i>                                                                                                                                                                                                                                                                                                                                                                                                                                                                                                                                                                                                                                                              |
| Manuscript ID                   | bmjopen-2019-030056.R2                                                                                                                                                                                                                                                                                                                                                                                                                                                                                                                                                                                                                                                       |
| Article Type:                   | Research                                                                                                                                                                                                                                                                                                                                                                                                                                                                                                                                                                                                                                                                     |
| Date Submitted by the Author:   | 17-Jun-2019                                                                                                                                                                                                                                                                                                                                                                                                                                                                                                                                                                                                                                                                  |
| Complete List of Authors:       | Fernandes, Gwen; University of Nottingham, Academic Rheumatology, School of Medicine<br>Parekh, Sanjay; University of Nottingham, Academic Rheumatology, School of Medicine<br>Moses, Jonathan; University of Nottingham, Academic Rheumatology, School of Medicine<br>Fuller, Colin; University of Nottingham<br>Scammell, Brigitte; University of Nottingham, Academic Rheumatology, School of Medicine<br>Batt, Mark ; University of Nottingham, Academic Rheumatology, School of Medicine<br>Zhang, Weiya; University of Nottingham, Academic Rheumatology, School of Medicine<br>Doherty, Michael ; University of Nottingham, Academic Rheumatology, School of Medicine |
| <b>Primary Subject Heading</b>: | Mental health                                                                                                                                                                                                                                                                                                                                                                                                                                                                                                                                                                                                                                                                |
| Secondary Subject Heading:      | Sports and exercise medicine, Epidemiology                                                                                                                                                                                                                                                                                                                                                                                                                                                                                                                                                                                                                                   |
| Keywords:                       | professional football, Depression & mood disorders < PSYCHIATRY, Anxiety disorders < PSYCHIATRY, pain                                                                                                                                                                                                                                                                                                                                                                                                                                                                                                                                                                        |
|                                 |                                                                                                                                                                                                                                                                                                                                                                                                                                                                                                                                                                                                                                                                              |

SCHOLARONE™  
Manuscripts

## Depressive symptoms and the General Health of Retired Professional Footballers compared to the General Population in the United Kingdom: A Case Control Study

Gwen Sascha Fernandes, research fellow<sup>1,2,3</sup>, Sanjay Parekh, doctoral student <sup>1,2</sup>, Jonathan Moses, foundation doctor<sup>1,2,5</sup>, Colin Fuller, risk management consultant<sup>2,4</sup>, Brigitte Scammell, professor of orthopaedics<sup>1,2,3,5</sup>, Mark Edward Batt, professor of sports and exercise medicine<sup>1,2,5</sup>, Weiya Zhang, professor of epidemiology<sup>1,2,3</sup>, Michael Doherty, professor of rheumatology<sup>1,2,3</sup>

1: Division of Rheumatology, Orthopaedics and Dermatology (School of Medicine, University of Nottingham), Academic Rheumatology, Nottingham City Hospital, NG5 1PB

2: Arthritis Research UK Centre for Sports, Exercise and Osteoarthritis, Queens Medical Centre, Derby Road, NG7 2UH

3: Arthritis Research UK Pain Centre, Nottingham City Hospital, NG5 1PB

4: Colin Fuller Consultancy Ltd, Sutton Bonnington, LE12 6PF

5: Nottingham University Hospitals NHS Trust, Queens Medical Centre, Derby Road, NG7 2UH

Correspondence to: Professor Weiya Zhang

Address: Academic Rheumatology, Clinical Sciences Building, Nottingham City Hospital, University of Nottingham, NG5 1PB.

Tel: 01158231756

Email: [weiya.zhang@nottingham.ac.uk](mailto:weiya.zhang@nottingham.ac.uk)

Manuscript Word Count: 3330 words

## Abstract

Objectives: To determine the prevalence of depressive symptoms and general health of male ex-professional footballers compared to general population controls.

Methods: 572 retired professional footballers and 500 general population controls in the UK were assessed by postal questionnaire. Anxiety and depressive symptoms were assessed using the Hospital Anxiety and Depression Scale (HADS) and a threshold score of  $\geq 11$  was used to indicate probable caseness. General health was ascertained using: the SF-12 quality of life tool; self-reported comorbidities, analgesic usage and body pain; and index of multiple deprivation (IMD) based on postcode data. Mood was assessed using the positive and negative affect scale (PANAS) and sleep using the Medical Outcome Survey (MOS). Linear regression analysis was used to determine relative risk (aRR) with 95% confidence intervals (CI) and adjusted for age, body mass index (BMI), comorbidities, body pain and medication usage.

Results: The prevalence of depressive symptoms in retired professional footballers was 5.66% compared to 5.76% in the general population and anxiety prevalence was also comparable (12.01% vs. 10.29%; all  $p > 0.05$ ). However, footballers had lower physical and mental component scores compared to controls ( $p < 0.01$ ). They also reported significantly more sleep problems, more negative mood profiles and more widespread body pain (aRR 1.88, 95% CI 1.15 - 3.09). They also reported greater pain medication usage compared with controls (aRR 1.54, 95% CI 1.26 - 1.89). However, compared to controls they were 26% (95% CI, 15% - 37%) less likely to report comorbidities, especially heart attacks (57%, 95% CI 27% - 74%) and diabetes (61%, 95% CI 37% - 76%).

Conclusions: The prevalence of depressive symptoms and anxiety symptoms and probable caseness in ex-professional footballers is comparable to general population controls. However, ex-footballers reported lower health-related quality of life, more widespread body pain and higher analgesic usage. Conversely lower reporting of diabetes and heart attacks indicate potential long-term physical health benefits from professional football.

## Keywords:

*Professional football, epidemiology, depressive symptoms, anxiety, sleep, pain, cardiovascular health*

## Article Summary:

*Strengths and Limitations of this study*

## Strengths:

- Largest study of depressive symptoms and general health in ex-professional footballers and controls in the UK
- Case-control study design with control male participants recruited from a community-based population sample representative of the UK general population

## Limitations:

- Outcomes were self-reported by participants using postal questionnaires
- Lack of current or previous physical activity levels assessed
- Higher response rate in the ex-footballers compared to the control participants.

## Introduction

Football is the world's most popular sport with over 300 million active players worldwide and 110,000 athletes registered at a professional level<sup>1</sup>. There has been considerable interest in whether the mental health of athletes is often compromised, especially by anxiety and depression<sup>2</sup>. Retired professional footballers may experience unique psychological stress factors primarily due to the nature and the intensity of the sport where severe or recurrent injuries are common<sup>3</sup>. Also, the pressures of competition, training and maintaining high-performance levels are hallmarks of a successful professional career<sup>4</sup>. The intensity of mental and physical demands may increase their susceptibility to certain mental health problems and risk-taking behaviour.

Despite individual high-profile cases of depression in professional footballers in the United Kingdom (e.g. Gary Speed, Paul Gascoigne, Clarke Carlisle), there is a lack of robust epidemiological studies on mental health issues in professional footballers. Studies on European former professional footballers from countries such as the Netherlands have reported anxiety and depression prevalence figures ranging from 25-43%<sup>5</sup>. However, none of these studies included a non-athlete or general population comparison group. A recent systematic review suggests that despite a seemingly higher risk of anxiety and depression in athletes in a range of elite sport, the figures are broadly comparable to the general population. The review further concluded that the evidence base is restricted by a paucity of high-quality study designs particularly in professional footballers<sup>6</sup>. Turner et al.<sup>7</sup> also found that anxiety and depression featured in 37% of former players with knee pain and knee osteoarthritis. A subsequent phenomenological study<sup>8</sup> suggested that these may be common sequelae of significant sport injuries that caused frustration and associated participation restrictions and limitations to work, social and leisure activities. However, studies focused on mental health and quality of life (QoL) of athletes are limited by study design; lack of power and small sample sizes; and comparison across sporting populations<sup>2,9-12</sup>. Therefore, there is a need for studies that: are focused on an individual sport such as professional football and its full-time players; are adequately powered for depression outcomes; include an age-adjusted control population; and investigate comorbidities and auxiliary measures of mental health and QoL indicators



1  
2  
3 such as sleep patterns, mood profiles and pain distribution including use of pain  
4 medication  
5  
6  
7

8 Therefore, based on previous research and the gaps in the evidence base, the  
9 objectives of the present study were to: (1) determine the prevalence of anxiety and  
10 depressive symptoms and probable caseness for each in retired professional  
11 footballers compared to general population controls; (2) determine the general health  
12 in retired professional footballers compared to general population controls; and (3)  
13 determine the risk and protective factors associated with professional football.  
14  
15  
16  
17  
18  
19  
20  
21  
22  
23  
24  
25  
26  
27  
28  
29  
30  
31  
32  
33  
34  
35  
36  
37  
38  
39  
40  
41  
42  
43  
44  
45  
46  
47  
48  
49  
50  
51  
52  
53  
54  
55  
56  
57  
58  
59  
60

For peer review only

## Methods

The Nottingham Research Ethics Committee 1 (Refs 14/EM/0045 & 14/EM/0015) approved this study. A cross-sectional design was used, involving a series of postal questionnaire surveys to ex-footballers and to a sample of men in the general population (aged 40 years and over) to gain information on symptoms of anxiety and depression, mood and sleep as well as simple demographics, occupational history, general health (comorbidities) and current medications. The exclusion criteria at baseline were known terminal illness, severe psychiatric illness or dementia, or any other condition or circumstance considered by their General Practice to make them unsuitable to receive the questionnaire.

### Patient and Public Involvement

The study was supported by a patient advisory group which provided input to the programme of research. Patients and ex-professional footballers partnered with us for the design of the study, the informational material to support the intervention, and the burden of the questionnaire from the patient's perspective. At the end of the study the patient advisory group commented on the findings and contributed to the dissemination plan and this included input on poster and oral presentations at local, national and international conferences.

### Participants

The recruitment of the source sample of ex-footballers and general population controls has been detailed in a previous publication examining the risk of knee pain and osteoarthritis in the footballers versus the controls<sup>13</sup>. Ex-footballers were recruited via the Professional Footballers' Association (PFA) and former players' associations (n=21 professional clubs). Inclusion criteria for ex-footballers were men aged over 40 years who had played professionally (in the top four tiers of the English Football League). The comparison group were recruited from the Knee Pain and Related Health in the Community Study (KPIC), involving recruitment via 12 general practitioner/family medicine (GP) practices in the UK Midlands region. All men on these UK National Health Service GP registers aged 40 years and older who were not terminally ill, were able to give written informed consent and had no other reason judged by the GPs to exclude them from the study were sent the questionnaire.

1  
2  
3 Individuals who indicated interest in further research conducted by the University of  
4 Nottingham were subsequently contacted with a follow-up questionnaire focused on  
5 mental health and QoL.  
6  
7

### 8 9 10 Questionnaire Survey

11 The postal questionnaire was developed based on previously published  
12 questionnaires and using extensively validated tools in the retired footballers and the  
13 control population. Through public and patient involvement, pilot versions of the  
14 questionnaire were evaluated to identify any problems with content, language and  
15 layout. The questionnaires were similarly constructed to capture detailed information  
16 about all participants (including football career history for retired footballers),  
17 anthropometric details (age and body mass index (BMI)), medical history and current  
18 medication usage.  
19  
20  
21  
22  
23  
24  
25  
26  
27

### 28 Age and body mass index (BMI)

29 Participants self-reported their date of birth and height and weight in the returned  
30 questionnaires. BMI was calculated as the weight divided by the square of height  
31 (kg/m<sup>2</sup>).  
32  
33  
34  
35

### 36 Symptoms of anxiety and depression

37 Anxiety and depressive symptoms were determined using the Hospital Anxiety and  
38 Depression Scale (HADS) which is comprised of 14 items, equally divided between  
39 the two mood states (anxiety and depression). Each item has a 4-point rating scale.  
40 Responders are asked to indicate their feelings based on the previous one week with  
41 recommended cut-off points indicating whether the responder is: a) within the normal  
42 range (scores of 0-7), b) mild-moderate caseness (scores of 8-10) and, c) severe  
43 caseness (scores of 11-21). Although cut-offs of > 8 have been used in some studies  
44 to indicate anxiety or depression<sup>14</sup> this threshold is considered too low and lacking in  
45 sensitivity for use in a general population sample<sup>15</sup> so a cut-off of  $\geq 11$  was used to  
46 identify definite anxiety and definite depression. This cut-off has been defined using  
47 psychiatric ratings of anxiety and depression disorders<sup>16</sup>. Whilst the gold-standard for  
48 a clinical diagnosis of generalized anxiety disorder or major depressive disorder is a  
49 detailed evaluation of symptom criteria using the Diagnostic and Statistical Manual of  
50 Mental Disorders (DSM-5), research has shown that it compares consistently with  
51  
52  
53  
54  
55  
56  
57  
58  
59  
60

1  
2  
3 HADS data both for sensitivity and specificity<sup>17</sup>. As the HADS is also simple, easy to  
4 administer and relatively short compared to the DSM-5<sup>18</sup>, we chose to include it as  
5 part of the postal questionnaires mailed to over 40,000 participants in this study.  
6  
7  
8  
9

### 10 Quality of Life Measures; Mental Health and Physical Health Component Scores

11 QoL was assessed using the Medical Outcome Study Short Form-36 Health Survey  
12 Questionnaire (SF-36) in the ex-footballers which was converted into SF-12 and the  
13 Medical Outcome Study Short Form-12 Health Survey Questionnaire (SF-12) in the  
14 general population controls. The difference in SF versions used was due to logistical  
15 factors: the SF-12 was a survey embedded within a questionnaire posted to the  
16 general population controls whose focus was on knee osteoarthritis outcomes and not  
17 mental health per se. As a result of these page restrictions, we used the shortened  
18 version, SF-12, for the controls compared to the second follow-up questionnaire  
19 posted to the ex-footballers which contained the SF-36. In order to aid comparison,  
20 the SF-36 outcomes were transformed into SF-12 outcomes as detailed by Jenkinson  
21 and colleagues<sup>19</sup>. Each SF response was used to calculate scores in each of the eight  
22 domains: physical functioning; role physical; bodily pain; general health perception;  
23 vitality; social functioning; role emotional; and mental health. These figures were then  
24 standardised using z-score transformations using means and standard deviations  
25 previously described<sup>19</sup>. Using the z scores for each scale, the aggregate score for two  
26 summary scales: the Mental Health Component Score (MCS) and the Physical Health  
27 Component Score (PCS) were calculated. Finally, the scores were standardised to a  
28 T-score where the mean was set to 50 and the standard deviation to 10. For the SF-  
29 12, scoring was conducted according to previously published data<sup>20,21</sup>. Item weights  
30 for response categories from an American population-based study, which was found  
31 comparable to other population studies in nine other countries including the United  
32 Kingdom, was used to standardise responses<sup>19</sup>. There is considerable evidence  
33 suggesting that the PCS and MCS from the SF-12 show similar levels of precision to  
34 the summary scores derived from the longer SF-36 version. Even though summary  
35 scores are not exactly identical the level of difference between the two is small and is  
36 not subjectively or clinically meaningful<sup>22</sup>.  
37  
38  
39  
40  
41  
42  
43  
44  
45  
46  
47  
48  
49  
50  
51  
52  
53  
54  
55  
56  
57

### 58 Medical Outcome Survey (MOS) Sleep Scale

59  
60

1  
2  
3 The sleep scale from MOS is a 12-item measure that is generic and not disease  
4 specific and measures 6 dimensions of sleep: sleep disturbance, snoring, shortness  
5 of breath with headache, sleep adequacy, somnolence and quantity of sleep<sup>23</sup>. The  
6 tool has demonstrated excellent reliability and validity for assessing sleep in  
7 community samples<sup>24,25</sup>. A sleep problems index (SLP-9) can be calculated using nine  
8 items from the MOS Sleep scale indicating quality of sleep on a 0-100 scale. The  
9 higher the score, the lower the quality of sleep. The quantity of sleep is recorded as  
10 the average hours of sleep per night over the previous 4-week period and was  
11 dichotomised as optimal sleep (if this was 7-8 hours) or non-optimal if this was less  
12 than 7 hours or greater than 8 hours as per MOS sleep scoring criteria.  
13  
14  
15  
16  
17  
18  
19  
20  
21

### 22 Positive and Negative Affect Scale (PANAS)

23 PANAS is a self-report questionnaire comprising two 10-item scales, which describe  
24 different feelings and emotions measuring both positive and negative affect<sup>26</sup>. The  
25 questionnaire asked responders to consider their feelings at the time of completing the  
26 questionnaire. The normal population reference guides for mean positive affect score  
27 is 29.7 (+ 7.9) and mean negative affect score is 14.8 (+ 5.4). PANAS has  
28 demonstrated high reliability and construct validity, is brief and ideal for use in self-  
29 reported questionnaires and has been used extensively alongside measures of anxiety  
30 and depression such as HADS<sup>27,28</sup>.  
31  
32  
33  
34  
35  
36  
37  
38  
39

### 40 Indices of Multiple Deprivation

41 The Index of Multiple Deprivations (IMD) is an official measure of the relative  
42 deprivation in England<sup>29</sup>. It ranks all areas in England from 1 (most deprived) to 32,844  
43 (least deprived area) and is based on weights given to key domains such as income,  
44 employment, education and housing. It uses postcodes to determine an overall  
45 measure of deprivation. This information was then presented in quintiles with  
46 percentage of footballers and controls within the lowest and highest quintiles.  
47  
48  
49  
50  
51  
52

### 53 Comorbidities

54 Individual comorbidities were self-reported according to a brief specific checklist  
55 enquiry (fibromyalgia, diabetes, heart attacks, hypertension, cancer), with data  
56 dichotomised into individuals with or without these conditions. An open text question  
57  
58  
59  
60

1  
2  
3 was also included to capture information on any other diagnosed medical conditions  
4 not on the checklist<sup>30</sup>.  
5  
6  
7

### 8 Widespread Body Pain 9

10 Widespread body pain was self-reported using a body pain mannequin<sup>31</sup>. It was scored  
11 using the American College of Rheumatology criteria for widespread body pain whose  
12 definition is pain in each of the four quadrants of the body and including the spinal or  
13 axial column. Reported pain in any part of the body was dichotomous (present/absent)  
14 and total number of regions with pain was a simple count of the shaded regions of the  
15 manikin.  
16  
17  
18  
19  
20  
21

### 22 Pain-relieving Medication 23

24 Self-reported analgesic medication (both prescribed and over the counter) was  
25 recorded and grouped as all pain-relieving medication, and sub-grouped as anti-  
26 inflammatory drugs (NSAIDs), opioids, other over the counter (OTC) and prescribed  
27 analgesics, and other medications with pain-modifying properties (e.g. citalopram and  
28 amitriptyline).  
29  
30  
31  
32  
33

### 34 Statistical Analyses 35

36 A power calculation was conducted based on a 12.6% prevalence of depressive  
37 symptoms in a non-clinical sample of community-derived adults using the HADS<sup>15</sup> and  
38 an odds ratio (OR) of 2 after adjustment for other known factors in ex-footballers. The  
39 sample size required to detect this OR, with 90% power and a 0.05% significance  
40 level, was 336 participants per group.  
41  
42  
43

44 Categorical variables were reported as frequencies and percentages, and continuous  
45 variables as mean and standard deviations (SD). To determine whether distributions  
46 of the variables were statistically significant between ex-footballers and controls a t-  
47 test (continuous variables) or chi-square test (categorical variables) was used. For the  
48 SF-12 outcomes, specifically the physical component score and mental component  
49 score between footballers and controls, we used the ranksum command in Stata,  
50 which compared two independent samples using the Mann-Whitney two-sample  
51 statistic. Statistical significance was defined as  $p < 0.05$ . We had very few missing  
52 data at random (e.g, where BMI was not reported by a participant). Imputation or  
53  
54  
55  
56  
57  
58  
59  
60

1  
2  
3 modelling was therefore not undertaken for the occasional missing values. Details on  
4 missing data have previously been published<sup>13</sup>.  
5  
6  
7

8 All analyses were conducted using Stata IC Version 14 on Windows 7 Operating  
9 System and power calculations were undertaken using OpenEpi Version 3.  
10  
11  
12  
13  
14  
15  
16  
17  
18  
19  
20  
21  
22  
23  
24  
25  
26  
27  
28  
29  
30  
31  
32  
33  
34  
35  
36  
37  
38  
39  
40  
41  
42  
43  
44  
45  
46  
47  
48  
49  
50  
51  
52  
53  
54  
55  
56  
57  
58  
59  
60

For peer review only

## Results

Of the 898 questionnaires sent to the retired professional footballers, 572 responses were received (63.7% response). Of 2215 questionnaires sent to general population controls, 500 questionnaires were received (22.6% response) (Figure 1).

Figure 1. Selection of ex-footballer and general population controls.

The mean age of the ex-footballers was significantly younger than the controls (60 versus 64 years)) but mean BMI were comparable (Table 1).

*Table 1. Characteristics of footballer and control populations.*

|                                                                                          | Footballers<br>n=572     | Controls<br>n=500         | p-value        |
|------------------------------------------------------------------------------------------|--------------------------|---------------------------|----------------|
| Age (years), mean (SD)                                                                   | 60.11 (10.77)            | 64.26 (9.37)              | <0.001         |
| BMI (kg/m <sup>2</sup> ), mean (SD)                                                      | 27.13 (3.40)             | 27.29 (4.48)              | 0.51           |
| HADS Anxiety score $\geq 11$ ,<br>n (%)                                                  | 70 (12.01)               | 50 (10.29)                | 0.34           |
| HADS Depression<br>score $\geq 11$ , n (%)                                               | 33 (5.66)                | 28 (5.76)                 | 0.94           |
| SF Physical Component<br>Score, mean (SD)                                                | 45.33 (10.32)            | 77.60 (8.35)              | <0.001         |
| SF Mental Component<br>Score, mean (SD)                                                  | 48.09 (7.47)             | 71.87 (6.64)              | <0.001         |
| Optimal sleep (7-8 hours<br>per night), n (%)                                            | 369 (64.51)              | 275 (56.70)               | 0.01           |
| Sleep Problem Index, n<br>(%) in highest tertile of<br>SIP                               | 186 (33.04)              | 131 (26.90)               | 0.03           |
| Positive Mood, mean<br>(SD)                                                              | 34.75 (8.05)             | 34.97 (6.86)              | 0.63           |
| Negative Mood, mean<br>(SD)                                                              | 16.5 (6.72)              | 14.22 (4.95)              | <0.001         |
| Indices of Multiple<br>Deprivation (IMD) n, (%)<br>in the lowest and highest<br>quintile | 17 (3.51)<br>205 (42.27) | 84 (17.28)<br>199 (40.95) | <0.001<br>0.18 |



1  
2  
3 The prevalence of probable depression was similar in the footballers and controls  
4 (5.7% versus 5.8%) but the prevalence of probable anxiety was slightly higher in the  
5 footballers (12.0% versus 10.3%) though this was not statistically significant. Although  
6 footballers and controls shared a similar positive mood profile, footballers were  
7 significantly more likely to experience negative moods compared to the controls and  
8 to have greater problems with sleep quality ( $p<0.05$ ). When using the sleep problem  
9 index, more footballers reported problems with sleep quality ( $p<0.05$ ) and poor sleep  
10 patterns which included restlessness, shortness of breath and drowsiness. They were  
11 also more likely to have lower scores in terms of both their physical and mental health  
12 component scores as indicated by the SF-12 QoL measure.  
13  
14  
15  
16  
17  
18  
19  
20  
21

22 With respect to social deprivation, fewer footballers (3.51%) were living in areas  
23 marked as the most deprived compared to the control population (17.28%;  $p<0.001$ ).  
24  
25  
26

27 Risk factors associated with professional football following adjustment for age and BMI  
28 are presented in Table 2. Ex-footballers overall were less likely to present with any  
29 comorbidity (diabetes, hypertension, myocardial infarction, cancer and fibromyalgia),  
30 especially diabetes (61%, 95% CI, 37-76%), heart attacks (57%, 95% CI 27-74%) and  
31 hypertension (21%, 95% CI 4-35%). However, footballers reported more widespread  
32 body pain using the ACR criteria (88%, 95% CI 15-30.9%). Footballers also  
33 consumed more NSAIDs (8.6% vs. 4.2%) and OTC analgesics (24% vs. 14%) but not  
34 opioids (4% vs. 6.4%) compared to the controls.  
35  
36  
37  
38  
39  
40  
41  
42  
43  
44  
45  
46  
47  
48  
49  
50  
51  
52  
53  
54  
55  
56  
57  
58  
59  
60

Table 2. Comparison of self-reported comorbidities, pain and medication in the ex-footballers compared to general population controls

|                                                                                     | Footballers<br>572 | Controls<br>500 | p-value | Adjusted relative risk<br>(95% CI)<br>(for age and bmi) |
|-------------------------------------------------------------------------------------|--------------------|-----------------|---------|---------------------------------------------------------|
| Comorbidities*<br>n (%)                                                             | 178 (30.58)        | 260 (52.31)     | <0.001  | 0.74 (0.63-0.85)+                                       |
| Comorbidities** n (%)<br>(by Charlson Comorbidity<br>Index weighting** mean<br>(SD) | 0.44 (0.80)        | 0.75 (0.98)     | <0.001  | 0.71 (0.6-0.85)+                                        |
| Diabetes, n (%)                                                                     | 22 (3.77)          | 57 (11.47)      | <0.001  | 0.39 (0.24-0.63)+                                       |
| Cancer, n (%)                                                                       | 40 (6.86)          | 50 (8.58)       | 0.07    | 0.88 (0.59-1.30)                                        |
| Heart Attacks, n (%)                                                                | 18 (3.08)          | 47 (9.46)       | <0.001  | 0.43 (0.26-0.73)+                                       |
| Hypertension, n (%)                                                                 | 134 (22.98)        | 169 (34.00)     | <0.001  | 0.79 (0.65-0.96)+                                       |
| Fibromyalgia, n (%)                                                                 | 3 (0.51)           | 1 (0.20)        | 0.39    | 3.08 (0.31-31.02)                                       |
| Any Body Pain, n (%)                                                                | 454 (78.14)        | 330 (71.90)     | 0.02    | 1.09 (1.00-1.17)~                                       |
| ACR Criteria                                                                        |                    |                 |         |                                                         |
| Widespread Body Pain<br>(no KP), n (%)                                              | 48 (8.40)          | 23 (4.60)       | 0.01    | 1.88 (1.15-3.09)~                                       |
| Total Regions with<br>Pain, mean (SD)                                               | 3.13 (3.29)        | 3.44 (3.05)     | 0.14    | 0.91 (0.79-1.05)                                        |
| Back pain, n (%)                                                                    | 176 (30.18)        | 146 (29.38)     | 0.57    | 1.00 (0.76-1.32)                                        |
| Knee pain, n (%)                                                                    | 337 (57.80)        | 193 (38.83)     | <0.001  | 1.47 (1.29-1.69)~                                       |
| Pain Medication Use, n<br>(%)                                                       | 240 (41.17)        | 165 (33.20)     | 0.007   | 1.54 (1.26-1.89)~                                       |
| Opioids, n (%)                                                                      | 23 (4.03)          | 32 (6.40)       | 0.07    | 0.64 (0.37-1.10)                                        |
| NSAIDS, n (%)                                                                       | 49 (8.58)          | 21 (4.20)       | 0.004   | 1.94 (1.19-3.20)~                                       |
| OTC Analgesics, n (%)                                                               | 137 (23.99)        | 70 (14.00)      | <0.001  | 1.86 (1.44-2.43)~                                       |
| Other medications***,<br>n (%)                                                      | 18 (3.15)          | 31 (6.20)       | 0.01    | 0.50 (0.28-0.94)+                                       |

\*Diabetes, hypertension, myocardial infarction, cancer and fibromyalgia

\*\*Includes myocardial infarction, hypertension, diabetes and cancer

\*\*\* Other medications with pain relieving effects.

+ Protective factors

~ Risk factors

## Discussion

This is the first study to report the prevalence of symptoms of depression and anxiety and the general health and QoL of retired professional footballers compared to a control population. The main findings are (1) the prevalence of probable depression and anxiety in the ex-footballers is comparable to men in the general population; (2) ex-footballers have a lower QoL as indicated by the SF-12 physical and mental component scores; (3) they are more likely to present with widespread body pain and use pain medication particularly OTC analgesics and NSAIDs; and (4) they are less likely to present with comorbidities, in particular diabetes, heart attacks and hypertension.

The study reported a prevalence of probable depression (6%) and anxiety (12%) in ex-footballers which is lower than the 25-43% reported by Goutterborge<sup>5</sup>. This discrepancy could result from smaller sample sizes (range of 70-149 ex-players), sample selection and status of footballers (current professional footballers from five different European countries), and the assessment tool used to determine depression and anxiety (12-item general health questionnaire (GHQ-12)) in that study. In a further study<sup>32</sup>, specifically investigating ex-footballers, estimated a 39% prevalence of both anxiety and depression using the GHQ-12. A number of self-report assessment tools have been used in epidemiological research to detect depression and anxiety<sup>32-34</sup>. While the GHQ-12 has demonstrated excellent validity in detecting depression in the general population<sup>35</sup>, the HADS has demonstrated better sensitivity and specificity in detecting depression. Indeed, the choice of assessment tool should be balanced with feasibility of approach, cost effectiveness, as well as the administration and scoring times involved<sup>32</sup>. Additionally, none of the previous studies in ex-footballers presented results for an adequately matched comparison group of non-professional footballers. The results of this study accord with a comparative meta-analysis in high-performance athletes and non-athletes showing similar levels of depression across the groups<sup>4</sup>. Elite athletes are sometimes supported with psychological training as part of their sport programs and may have developed mental toughness and resilience in order to cope with stress, anxiety and even depression<sup>36-39</sup>. There is a noted stigma about reporting mental health symptoms both in ex-footballer and general population samples which may result in choosing to suppress, ignore and not seek further help when

1  
2  
3 needed<sup>6,35,40</sup>. Furthermore, when compared to another general population study, the  
4 prevalence of depression (7-9%) and anxiety (8-14%) in general population men aged  
5 40-65 years is comparable to the controls in this study, suggesting that this East  
6 Midlands control population are representative of the British general population and  
7 are a valid control group<sup>41</sup>.  
8  
9

10  
11  
12  
13 In terms of QoL, the ex-footballers had significantly lower scores in both physical and  
14 mental components compared to controls. It has been postulated that this negative  
15 effect on QoL is a consequence of reporting more specific joint pain (e.g. knee pain)  
16 and more overall body pain<sup>13,42</sup>. Although both the ex-footballers and the control  
17 population indicated pain in one region on a body pain manikin (78% vs. 72%), after  
18 adjustment for age and BMI, ex-footballers are 88% more likely to present with  
19 widespread body pain when using the more stringent ACR criteria compared to the  
20 control group. Widespread pain can have significant, deleterious effects on physical  
21 and mental health and well-being<sup>43</sup> including implications on sleep disturbance and  
22 mood. Longitudinal cohort studies have shown that insomnia and sleep disturbances  
23 significantly increase the risk of chronic pain in pain-free individuals at baseline whilst  
24 pain is not a strong predictor of insomnia<sup>44</sup>. As a result of the cross-sectional nature  
25 of this study, we cannot ascertain causation between pain and sleep. However, the  
26 results in ex-footballers show that whilst sleep duration may be marginally better (64.5  
27 vs. 56.7% for 7-8 hours of sleep), the quality of sleep was more disturbed in terms of  
28 restlessness, feeling tense or drowsy compared to controls. The effect on mood is  
29 also notable with ex-footballers more likely to present with negative feelings and  
30 emotions such as distress, irritability, fear and nervousness compared to controls. The  
31 association of emotional distress and pain-related fear on patients with chronic pain  
32 has been established in previous population-based studies<sup>45-48</sup>. Widespread body pain  
33 is a key feature of fibromyalgia, but the cross-sectional nature of this study does not  
34 allow investigation of temporal trends<sup>47</sup>. A further indication of higher pain levels in ex-  
35 footballers is the significantly higher use of analgesics (41%) compared to controls  
36 (33%) and in particular NSAIDs (8.58% vs. 4.20%) and OTC analgesics (24% vs.  
37 14%). The use of analgesics presumably reflects compromised musculoskeletal  
38 health, whereas in terms of systemic general health the footballers reported  
39 significantly less diabetes, cancer, heart attacks and hypertension compared to  
40 controls. These results accord with previous studies of elite male athletes and ex-  
41  
42  
43  
44  
45  
46  
47  
48  
49  
50  
51  
52  
53  
54  
55  
56  
57  
58  
59  
60

1  
2  
3 footballers with lower risk of ischaemic heart disease and diabetes, but an elevated  
4 risk of musculoskeletal conditions particularly lower limb osteoarthritis<sup>13,49</sup>.  
5 Interestingly, ex-footballers reported significantly lower use of drugs such as  
6 citalopram, diazepam, and temazepam which are used primarily in the treatment of  
7 depression and anxiety respectively. Although the study was not powered for  
8 medication outcomes, the use of medication in the footballer cohort was primarily for  
9 pain relief rather than relief for mental health problems. In fact, ex-footballers may have  
10 developed a certain resilience and mental toughness due to being an elite athlete  
11 which may be a protective factor for long term mental ill-health<sup>4,37,49,50</sup>.  
12  
13  
14  
15  
16  
17  
18  
19

20 There are several caveats to this study. Firstly, this was a postal questionnaire study  
21 focused on pain and osteoarthritis in ex-footballers<sup>13</sup>, and a community sample<sup>32</sup>, so  
22 may be subject to response bias (those with pain are more likely to respond). However,  
23 this would not explain the between group differences. Secondly, the response rate  
24 was higher in the ex-footballer cohort than the controls (63.7% vs. 22.6%) and the low  
25 response rate in controls questions the representativeness of the sample. Thirdly, the  
26 comorbidities and medications were self-reported, and due to logistical reasons  
27 relating to questionnaire length, data on established associated risk factors for  
28 depression and anxiety such as smoking status, alcohol consumption, educational,  
29 marital and economic status<sup>51-54</sup> were not available. Also, although the study did not  
30 find any differences between ex-footballers and controls in terms of mental health it  
31 would have been interesting to examine mental toughness, resilience, optimism and  
32 general pain coping mechanisms between the two populations. Future epidemiological  
33 research on this topic should explore these relationships in more detail.. Also, our use  
34 of the self-completed HADS alone is a limitation as this measure only the symptoms  
35 of depression or anxiety as opposed to producing a definitive clinical diagnosis.  
36 Although we used the upper suggested cut-off of the HADS as a surrogate for probable  
37 depression and anxiety, the prevalence data for this dichotomous cut-off should be  
38 interpreted with this important caveat in mindFurthermore, this study did not  
39 specifically measure two aspects of quality of life: physical health via current physical  
40 activity levels, and, social relations via personal relationships or available social  
41 support. These data would have given us insight into current physical fitness levels,  
42 physical limitations as a consequence of musculoskeletal conditions, and whether  
43 there was adequate psychosocial support in an individual's life. These form some of  
44  
45  
46  
47  
48  
49  
50  
51  
52  
53  
54  
55  
56  
57  
58  
59  
60

1  
2  
3 the core tenets of a healthy quality of life<sup>53</sup> and may have offered robust data on  
4 previously reported anecdotal effects of bankruptcy, divorce or trauma particularly in  
5 the ex-footballers<sup>55</sup>. Finally, we did not examine the effects of repetitive heading of  
6 footballs and risk of head injury and concussion in professional footballers, and the  
7 possible long-term health impact that this could have on neuro-cognition and mental  
8 health. A future study is planned to address this issue.  
9  
10  
11  
12  
13  
14

15 In summary, this is the largest study on symptoms of anxiety and depression and  
16 quality of life in ex-professional footballers and the first to include an age-adjusted  
17 general population comparison sample. The results show that ex-footballers are just  
18 as likely to have anxiety and depression symptoms as controls, but they have lower  
19 QoL in terms of both physical and mental composite scores. However, despite  
20 reporting more widespread body pain and use of analgesics, they are less likely to  
21 report cardiovascular disease or diabetes. The results suggest that healthcare  
22 providers, club management and football organisations should be focused on  
23 improving musculoskeletal pain management strategies in ex-footballers. Further  
24 study on the potential benefits of professional sport on pain coping and resilience  
25 mechanisms which may be protective factors for long term psychological  
26 consequences such as depression and anxiety would benefit the large numbers of ex-  
27 professional footballers both nationally and internationally. It would also be valuable  
28 to explore the effects of neurocognitive functioning on mental health in ex-footballers  
29 and capture the granularity around type, severity and frequencies of injuries such as  
30 concussion and the subsequent long-term health impact.  
31  
32  
33  
34  
35  
36  
37  
38  
39  
40  
41  
42  
43  
44  
45  
46  
47  
48  
49  
50  
51  
52  
53  
54  
55  
56  
57  
58  
59  
60

## References:

1. FIFA Big Count 2006. FIFA Facts, 2016. [http://www.fifa.com/mm/document/fifafacts/bcoffsurv/bigcount.statspackage\\_7024.pdf](http://www.fifa.com/mm/document/fifafacts/bcoffsurv/bigcount.statspackage_7024.pdf) ( Accessed 10 Oct 2016).
2. Gulliver A, Griffiths KM, Mackinnon A, et al. The mental health of Australian elite athletes. *Journal of science and medicine in sport* 2015;18(3):255-61. doi: 10.1016/j.jsams.2014.04.006 [published Online First: 2014/06/03]
3. Ekstrand J, Hagglund M, Walden M. Injury incidence and injury patterns in professional football: the UEFA injury study. *British journal of sports medicine* 2011;45(7):553-8. doi: 10.1136/bjsm.2009.060582 [published Online First: 2009/06/26]
4. Gorczynski PF, Coyle M, Gibson K. Depressive symptoms in high-performance athletes and non-athletes: a comparative meta-analysis. *British journal of sports medicine* 2017;51(18):1348-54. doi: 10.1136/bjsports-2016-096455 [published Online First: 2017/03/04]
5. Gouttebauge V, Backx FJ, Aoki H, et al. Symptoms of Common Mental Disorders in Professional Football (Soccer) Across Five European Countries. *Journal of sports science & medicine* 2015;14(4):811-8. [published Online First: 2015/12/15]
6. Rice SM, Purcell R, De Silva S, et al. The Mental Health of Elite Athletes: A Narrative Systematic Review. *Sports Medicine* 2016;46(9):1333-53. doi: 10.1007/s40279-016-0492-2
7. Turner AP, Barlow JH, Heathcote-Elliott C. Long term health impact of playing professional football in the United Kingdom. 2000;34(5):332-36. doi: 10.1136/bjsm.34.5.332 %J British Journal of Sports Medicine
8. Turner A, Barlow J, Ilbery B. Play Hurt, Live Hurt: Living with and Managing Osteoarthritis from the Perspective of Ex-professional Footballers. *Journal of health psychology* 2002;7(3):285-301. doi: 10.1177/1359105302007003222 [published Online First: 2002/05/01]
9. Armstrong S, Oomen-Early J. Social connectedness, self-esteem, and depression symptomatology among collegiate athletes versus nonathletes. *Journal of American college health : J of ACH* 2009;57(5):521-6. doi: 10.3200/jach.57.5.521-526 [published Online First: 2009/03/04]
10. Spengler A, Schneider G, Schröder E. Depressivität—Screening und Vorkommen in der sportmedizinischen Praxis. *Dtsch Z Sportmed* 2013;64:65–8.
11. Junge A, Feddermann-Demont N. Prevalence of depression and anxiety in top-level male and female football players. 2016;2(1):e000087. doi: 10.1136/bmjsem-2015-000087 %J BMJ Open Sport & Exercise Medicine

- 1  
2  
3 12. Prinz B, Dvořák J, Junge A. Symptoms and risk factors of depression during and after the  
4 football career of elite female players. 2016;2(1):e000124. doi: 10.1136/bmjsem-2016-000124  
5 %J BMJ Open Sport & Exercise Medicine  
6  
7 13. Fernandes GS, Parekh SM, Moses J, et al. Prevalence of knee pain, radiographic  
8 osteoarthritis and arthroplasty in retired professional footballers compared with men in the  
9 general population: a cross-sectional study. *British journal of sports medicine*  
10 2018;52(10):678-83. doi: 10.1136/bjsports-2017-097503 [published Online First: 2017/11/05]  
11  
12 14. Mykletun A, Stordal E, Dahl AA. Hospital Anxiety and Depression (HAD) scale: factor  
13 structure, item analyses and internal consistency in a large population. *The British journal of*  
14 *psychiatry : the journal of mental science* 2001;179:540-4.  
15  
16 15. Crawford JR, Henry JD, Crombie C, et al. Normative data for the HADS from a large non-  
17 clinical sample. *The British journal of clinical psychology* 2001;40(Pt 4):429-34. [published  
18 Online First: 2002/01/05]  
19  
20 16. Hinz, A., & Brahler, E. (2011). Normative values for the hospital anxiety and depression scale  
21 (HADS) in the general German population. *J Psychosom Res*, 71(2), 74-78.  
22 doi:10.1016/j.jpsychores.2011.01.005  
23  
24 17. Olsson, I., Mykletun, A., & Dahl, A. A. (2005). The Hospital Anxiety and Depression Rating  
25 Scale: a cross-sectional study of psychometrics and case finding abilities in general practice.  
26 *BMC Psychiatry*, 5, 46. doi:10.1186/1471-244x-5-46  
27  
28 18. Stern, A. F. (2014). The Hospital Anxiety and Depression Scale. *Occupational Medicine*,  
29 64(5), 393-394. doi:10.1093/occmed/kqu024 %J Occupational Medicine  
30  
31  
32  
33  
34  
35  
36  
37  
38  
39  
40  
41  
42  
43  
44  
45  
46  
47  
48  
49  
50  
51  
52  
53  
54  
55  
56  
57  
58  
59  
60



19. Jenkinson C, Layte R, Jenkinson D, et al. A shorter form health survey: can the SF-12 replicate results from the SF-36 in longitudinal studies? *Journal of public health medicine* 1997;19(2):179-86. [published Online First: 1997/06/01]
20. B. Gandek, J.E. Ware, N.K. Aaronson, et al. Cross-validation of item selection and scoring for the SF-12 Health Survey in nine countries: results from the IQOLA Project. *International Quality of Life Assessment J Clin Epidemiol*, 51 1998, pp. 1171-1178
21. Ware JE, Jr., Gandek B, Kosinski M, et al. The equivalence of SF-36 summary health scores estimated using standard and country-specific algorithms in 10 countries: results from the IQOLA Project. *International Quality of Life Assessment. Journal of clinical epidemiology* 1998;51(11):1167-70. [published Online First: 1998/11/17]
22. Jenkinson C, Layte R, Jenkinson D, et al. A shorter form health survey: can the SF-12 replicate results from the SF-36 in longitudinal studies? *Journal of public health medicine* 1997;19(2):179-86. [published Online First: 1997/06/01]
23. Hays, R. D., & Stewart, A. L. Sleep measures. In A. L. Stewart & J. E. Ware (eds.), *Measuring functioning and well-being: The Medical Outcomes Study approach*, 1992. (pp. 235-259), Durham, NC: Duke University Press.
24. Allen RP, Kosinski M, Hill-Zabala CE, et al. Psychometric evaluation and tests of validity of the Medical Outcomes Study 12-item Sleep Scale (MOS sleep). *Sleep medicine* 2009;10(5):531-9. doi: 10.1016/j.sleep.2008.06.003 [published Online First: 2008/09/23]
25. Williams DA, Arnold LM. Measures of fibromyalgia: Fibromyalgia Impact Questionnaire (FIQ), Brief Pain Inventory (BPI), Multidimensional Fatigue Inventory (MFI-20), Medical Outcomes Study (MOS) Sleep Scale, and Multiple Ability Self-Report Questionnaire (MASQ). *Arthritis care & research* 2011;63 Suppl 11:S86-97. doi: 10.1002/acr.20531 [published Online First: 2012/05/25]
26. Watson D, Clark LA, Tellegen A. Development and validation of brief measures of positive and negative affect: the PANAS scales. *Journal of personality and social psychology* 1988;54(6):1063-70. [published Online First: 1988/06/01]
27. Clark LA, Watson D. Tripartite model of anxiety and depression: psychometric evidence and taxonomic implications. *Journal of abnormal psychology* 1991;100(3):316-36. [published Online First: 1991/08/01]
28. Crawford JR, Henry JD. The positive and negative affect schedule (PANAS): construct validity, measurement properties and normative data in a large non-clinical sample. *The British journal of clinical psychology* 2004;43(Pt 3):245-65. doi: 10.1348/0144665031752934 [published Online First: 2004/08/31]
29. English Indices of Deprivation, 2015. Available from. <https://www.gov.uk/government/statistics/english-indices-of-deprivation-2015> [Accessed 10th May 2018]
30. Fernandes GS, Sarmanova A, Warner S, et al. Knee pain and related health in the community study (KPIC): a cohort study protocol. *BMC musculoskeletal disorders* 2017;18(1):404. doi: 10.1186/s12891-017-1761-4
31. Hunt IM, Silman AJ, Benjamin S, et al. The prevalence and associated features of chronic widespread pain in the community using the 'Manchester' definition of chronic widespread pain. *Rheumatology (Oxford, England)* 1999;38(3):275-9. [published Online First: 1999/05/18]
32. Goutteborge V, Aoki H, Kerkhoffs GM. Prevalence and determinants of symptoms related to mental disorders in retired male professional footballers. *The Journal of sports medicine and physical fitness* 2016;56(5):648-54. [published Online First: 2016/06/11]

- 1  
2  
3  
4 33. Williams JW, Jr., Pignone M, Ramirez G, et al. Identifying depression in primary care: a  
5 literature synthesis of case-finding instruments. *General hospital psychiatry* 2002;24(4):225-  
6 37. [published Online First: 2002/07/09]  
7  
8 34. J. ODP, E. FA, Liam S, et al. Factors associated with depression in a representative sample  
9 of 14 217 people aged 75 and over in the United Kingdom: results from the MRC trial of  
10 assessment and management of older people in the community. *International Journal of*  
11 *Geriatric Psychiatry* 2003;18(7):623-30. doi:10.1002/gps.896  
12  
13 35. Office for National Statistics. Measuring National Well-being: Quality of Life in the UK, 2018.  
14 Available from: [www.ons.gov.uk/](http://www.ons.gov.uk/peoplepopulationandcommunity/wellbeing/articles/measuringnationalwellbeing/qualityoflifeintheuk2018)  
15 [peoplepopulationandcommunity/wellbeing/articles/measuringnationalwellbeing/qualityoflifeinthe](http://www.ons.gov.uk/peoplepopulationandcommunity/wellbeing/articles/measuringnationalwellbeing/qualityoflifeintheuk2018)  
16 [uk2018](http://www.ons.gov.uk/peoplepopulationandcommunity/wellbeing/articles/measuringnationalwellbeing/qualityoflifeintheuk2018) [Accessed 5<sup>th</sup> May 2018]  
17  
18 36. Lundin A, Hallgren M, Theobald H, et al. Validity of the 12-item version of the General Health  
19 Questionnaire in detecting depression in the general population. *Public health* 2016;136:66-  
20 74. doi: 10.1016/j.puhe.2016.03.005 [published Online First: 2016/04/05]  
21  
22 37. Jones G, Hanton S, Connaughton D. A Framework of Mental Toughness in the World's Best  
23 Performers. *The Sport Psychologist* 2007;21(2):243-64. doi: 10.1123/tsp.21.2.243  
24  
25 38. Zeiger JS, Zeiger RS. Mental toughness latent profiles in endurance athletes. *PLoS one*  
26 2018;13(2):e0193071. doi: 10.1371/journal.pone.0193071 [published Online First:  
27 2018/02/24]  
28  
29 39. Tham, E.K.. and Weigand, D.A. Mental Toughness Strategies of the World's Greatest  
30 Athletes: the Ultimate Guidebook for developing your medal-winning potential in sport. 2010.  
31 USA: Health Sciences Academy.  
32  
33 40. Bamford, S, Holley-Moore, G and Watson, J. New Perspective and approaches to  
34 understanding dementia and stigma. Available from:  
35 [http://www.ilcuk.org.uk/index.php/publications/publication\\_details/new\\_perspectives\\_and\\_app](http://www.ilcuk.org.uk/index.php/publications/publication_details/new_perspectives_and_approaches_to_understanding_dementia_and_stigma)  
36 [roaches\\_to\\_understanding\\_dementia\\_and\\_stigma](http://www.ilcuk.org.uk/index.php/publications/publication_details/new_perspectives_and_approaches_to_understanding_dementia_and_stigma) [Accessed 1<sup>ST</sup> May 2017]  
37  
38 41. Breeman S, Cotton S, Fielding S, et al. Normative data for the Hospital Anxiety and  
39 Depression Scale. *Quality of Life Research* 2015;24(2):391-98. doi: 10.1007/s11136-014-  
40 0763-z  
41  
42 42. Neville A, Peleg R, Singer Y, et al. Chronic pain: a population-based study. *The Israel Medical*  
43 *Association journal : IMAJ* 2008;10(10):676-80. [published Online First: 2008/11/18]  
44  
45 43. McCarberg BH, Nicholson BD, Todd KH, et al. The impact of pain on quality of life and the  
46 unmet needs of pain management: results from pain sufferers and physicians participating in  
47 an Internet survey. *American journal of therapeutics* 2008;15(4):312-20. doi:  
48 10.1097/MJT.0b013e31818164f2 [published Online First: 2008/07/23]  
49  
50 44. Finan, P. H., Goodin, B. R., & Smith, M. T. The association of sleep and pain: An update and  
51 a path forward. *The Journal of Pain, 2013. Official Journal of the American Pain*  
52 *Society, 14*(12), 1539–1552. <http://doi.org/10.1016/j.jpain.2013.08.007>  
53  
54 45. McBeth J, Macfarlane GJ, Benjamin S, et al. Features of somatization predict the onset of  
55 chronic widespread pain: results of a large population-based study. *Arthritis and rheumatism*  
56 2001;44(4):940-6. doi: 10.1002/1529-0131(200104)44:4<940::aid-anr151>3.0.co;2-s  
57 [published Online First: 2001/04/24]  
58  
59 46. Sullivan MJ, Thorn B, Haythornthwaite JA, et al. Theoretical perspectives on the relation  
60 between catastrophizing and pain. *The Clinical journal of pain* 2001;17(1):52-64. [published  
Online First: 2001/04/06]

- 1  
2  
3  
4 47. Larsson, C., Ekvall Hansson, E., Sundquist, K., & Jakobsson, U. Impact of pain  
5 characteristics and fear-avoidance beliefs on physical activity levels among older adults with  
6 chronic pain: a population-based, longitudinal study. *BMC Geriatrics*, 2016. 16, 50.  
7 <http://doi.org/10.1186/s12877-016-0224-3>  
8  
9 48. Gupta A, Silman AJ, Ray D, et al. The role of psychosocial factors in predicting the onset of  
10 chronic widespread pain: results from a prospective population-based study. *Rheumatology*  
11 *(Oxford, England)* 2007;46(4):666-71. doi: 10.1093/rheumatology/kel363 [published Online  
12 First: 2006/11/07]  
13  
14 49. Sarna S, Kaprio J, Kujala UM, et al. Health status of former elite athletes. The Finnish  
15 experience. *Aging (Milan, Italy)* 1997;9(1-2):35-41. [published Online First: 1997/02/01]  
16  
17 50. Nicholls, A.R. , Polman, R.C.J. , Levy, A.R. , , Backhouse, S.H. Mental toughness, optimism,  
18 pessimism, and coping among athletes. *Personality and Individual Differences*,  
19 2008. 44, 1182–1192  
20  
21 51. Beekman AT, Deeg DJ, van Tilburg T, et al. Major and minor depression in later life: a study  
22 of prevalence and risk factors. *Journal of affective disorders* 1995;36(1-2):65-75. [published  
23 Online First: 1995/12/24]  
24  
25 52. Martin G. Cole, Nandini Dendukuri. Risk Factors for Depression Among Elderly Community  
26 Subjects: A Systematic Review and Meta-Analysis. *American Journal of Psychiatry*  
27 2003;160(6):1147-56. doi: 10.1176/appi.ajp.160.6.1147  
28  
29 53. Wolanin A, Gross M, Hong E. Depression in athletes: prevalence and risk factors. *Current*  
30 *sports medicine reports* 2015;14(1):56-60. doi: 10.1249/jsr.000000000000123 [published  
31 Online First: 2015/01/13]  
32  
33 54. World Health Organisation (WHO) 2018. Measuring Quality of Life. Available from:  
34 <http://www.who.int/healthinfo/survey/whoqol-qualityoflife/en/index4.html> [Accessed 2nd Feb  
35 2018]  
36  
37 55. Gernon, A. 2016. Retired: What Happens to Footballers When the Game's Up. Durrington:  
38 Pitch Publishing.  
39  
40  
41  
42  
43  
44  
45  
46  
47  
48  
49  
50  
51  
52  
53  
54  
55  
56  
57  
58  
59  
60

## Acknowledgements and Affiliations:

### Acknowledgements

The study was funded by the Arthritis Research UK Centre for Sports, Exercise and Osteoarthritis (Grant 20194). The study was also funded by FIFA's Medical Assessment and Research Centre as well as the Professional Footballers' Association.

We are grateful to the Arthritis Research UK Pain Centre in Nottingham for access to KPIC participants. We would like to acknowledge the invaluable assistance and advice from Dr Charlotte Cowie (SPIRE), Richard Jobson, John Bramhall and Ben Simpson in the administration of players' database with the support of the Professional Football Association. We would also like to thank the members of our Patient and Public Involvement group for their time and advice with designing the questionnaire and being involved and helping with every stage of the research process.

### Affiliations

None of the study sponsors/funders were involved in the study design, in the collection, analysis and interpretation of data, in the writing of the report and in the decision to submit the article for publication.

All researchers were independent from funders.

All authors had full access to all the data in the study and take responsibility for the integrity of the data and the accuracy of the data analysis.

review only

## Declarations:

### Consent:

The study was approved by Nottingham University Hospitals NHS Trust and the Nottingham Research Ethics Committee 1 (Refs 14/EM/0045 & 14/EM/0015) and registered (clinicaltrials.gov portal: NCT02098044 & NCT02098070).

All participants offered consent by responding to the postal questionnaire survey and written informed consent prior to radiographic assessment at the SPIRE Hospitals and the Nottingham City Hospital.

### Contributor's statement:

GSF designed the data collection tools, wrote the statistical plan, implemented the study design (conducted the study), conducted cleaning and analysis of the data, wrote the initial drafts of the paper and subsequently revised the paper after feedback from the team. SMP designed the data collection tools, wrote the statistical plan, implemented the study design (conducted the study), conducted cleaning and analysis of the data, and drafted and revised the paper. JPM conducted cleaning and analysis of the data, and drafted and revised the paper. CWF conceptualised the study and drafted and revised the paper. BS conceptualised the study and drafted and revised the paper. MEB monitored data collection and drafted and revised the paper. WZ conceptualised and designed the study and data collection tools, wrote the statistical plan, monitored data collection and drafted and revised the paper. MD conceptualised and designed the study and data collection tools, monitored data collection and drafted and revised the paper. He is guarantor.

### Conflict of Interest Disclosures:

All authors have completed the ICMJE uniform disclosure form at [www.icmje.org/coi\\_disclosure.pdf](http://www.icmje.org/coi_disclosure.pdf) and declare: financial support (research grant) for the submitted work from FIFA Medical Assessment and Research Centre, other from Arthritis Research UK Centre for Sports, Exercise and Osteoarthritis (Grant Reference 20194); research grant from the Professional Footballers' Association and financial support from the SPIRE Healthcare Group at the Football Association (St George's Park); CF did paid consultancy for FIFA Medical Assessment and Research Centre, the Football Association and the Premier League in the past three years and has received personal fees from these bodies outside the remit of the submitted work; MD received research funding by AstraZeneca, Nordic Biosciences, Roche, outside the submitted work; Dr. Zhang reports grants from Arthritis Research UK, grants from Arthritis Research UK, during the conduct of the study; other from AstraZeneca, other from Daiichi Sankyo, other from Biobarica, other from Hisun, outside the submitted work; no financial relationships with any organisation that might have an interest in the submitted work in the previous three years for any other authors; no other relationships or activities that could appear to have influenced the submitted work.

### Copyright / license for publication

"The Corresponding Author has the right to grant on behalf of all authors and does grant on behalf of all authors, a worldwide license to the Publishers and its licensees in perpetuity, in all forms, formats and media (whether known now or created in the future), to i) publish, reproduce, distribute, display and store the Contribution, ii) translate the Contribution into other languages, create adaptations, reprints, include within collections and create summaries, extracts and/or, abstracts of the Contribution,

1  
2  
3 iii) create any other derivative work(s) based on the Contribution, iv) to exploit all  
4 subsidiary rights in the Contribution, v) the inclusion of electronic links from the  
5 Contribution to third party material where-ever it may be located; and, vi) license any  
6 third party to do any or all of the above.”  
7  
8

9 Data Sharing: No additional data available.

10  
11 Transparency Declaration: Professor Michael Doherty (MD) affirms that the  
12 manuscript is an honest, accurate, and transparent account of the study being  
13 reported and that no important aspects of the study have been omitted.  
14  
15  
16  
17  
18  
19  
20  
21  
22  
23  
24  
25  
26  
27  
28  
29  
30  
31  
32  
33  
34  
35  
36  
37  
38  
39  
40  
41  
42  
43  
44  
45  
46  
47  
48  
49  
50  
51  
52  
53  
54  
55  
56  
57  
58  
59  
60

For peer review only

1  
2  
3  
4  
5  
6  
7  
8  
9  
10  
11  
12  
13  
14  
15  
16  
17  
18  
19  
20  
21  
22  
23  
24  
25  
26  
27  
28  
29  
30  
31  
32  
33  
34  
35  
36  
37  
38  
39  
40  
41  
42  
43  
44  
45  
46  
47  
48  
49  
50  
51  
52  
53  
54  
55  
56  
57  
58  
59  
60



Figure 1 Selection of ex-footballer and general population controls.

58x51mm (300 x 300 DPI)

**STROBE 2007 (v4) checklist of items to be included in reports of observational studies in epidemiology\***  
**Checklist for cohort, case-control, and cross-sectional studies (combined)**

| Section/Topic             | Item # | Recommendation                                                                                                                                                                                                                                                                                                                                                                                                                                                         | Reported on page # |
|---------------------------|--------|------------------------------------------------------------------------------------------------------------------------------------------------------------------------------------------------------------------------------------------------------------------------------------------------------------------------------------------------------------------------------------------------------------------------------------------------------------------------|--------------------|
| Title and abstract        | 1      | (a) Indicate the study's design with a commonly used term in the title or the abstract                                                                                                                                                                                                                                                                                                                                                                                 | Page 1 and 2       |
|                           |        | (b) Provide in the abstract an informative and balanced summary of what was done and what was found                                                                                                                                                                                                                                                                                                                                                                    | Page 2             |
| <b>Introduction</b>       |        |                                                                                                                                                                                                                                                                                                                                                                                                                                                                        |                    |
| Background/rationale      | 2      | Explain the scientific background and rationale for the investigation being reported                                                                                                                                                                                                                                                                                                                                                                                   | Page 4 and 5       |
| Objectives                | 3      | State specific objectives, including any pre-specified hypotheses                                                                                                                                                                                                                                                                                                                                                                                                      | Page 5             |
| <b>Methods</b>            |        |                                                                                                                                                                                                                                                                                                                                                                                                                                                                        |                    |
| Study design              | 4      | Present key elements of study design early in the paper                                                                                                                                                                                                                                                                                                                                                                                                                | Page 6             |
| Setting                   | 5      | Describe the setting, locations, and relevant dates, including periods of recruitment, exposure, follow-up, and data collection                                                                                                                                                                                                                                                                                                                                        | Pages 6-9          |
| Participants              | 6      | (a) <i>Cohort study</i> —Give the eligibility criteria, and the sources and methods of selection of participants. Describe methods of follow-up<br><i>Case-control study</i> —Give the eligibility criteria, and the sources and methods of case ascertainment and control selection. Give the rationale for the choice of cases and controls<br><i>Cross-sectional study</i> —Give the eligibility criteria, and the sources and methods of selection of participants | Page 6             |
|                           |        | (b) <i>Cohort study</i> —For matched studies, give matching criteria and number of exposed and unexposed<br><i>Case-control study</i> —For matched studies, give matching criteria and the number of controls per case                                                                                                                                                                                                                                                 | Page 10-11         |
| Variables                 | 7      | Clearly define all outcomes, exposures, predictors, potential confounders, and effect modifiers. Give diagnostic criteria, if applicable                                                                                                                                                                                                                                                                                                                               | Page 7-9           |
| Data sources/ measurement | 8*     | For each variable of interest, give sources of data and details of methods of assessment (measurement). Describe comparability of assessment methods if there is more than one group                                                                                                                                                                                                                                                                                   | Page 7-9           |
| Bias                      | 9      | Describe any efforts to address potential sources of bias                                                                                                                                                                                                                                                                                                                                                                                                              | Page 9 and page 16 |
| Study size                | 10     | Explain how the study size was arrived at                                                                                                                                                                                                                                                                                                                                                                                                                              | Page 10, 11        |
| Quantitative variables    | 11     | Explain how quantitative variables were handled in the analyses. If applicable, describe which groupings were chosen and why                                                                                                                                                                                                                                                                                                                                           | Page 7-9           |
| Statistical methods       | 12     | (a) Describe all statistical methods, including those used to control for confounding                                                                                                                                                                                                                                                                                                                                                                                  | Page 10            |
|                           |        | (b) Describe any methods used to examine subgroups and interactions                                                                                                                                                                                                                                                                                                                                                                                                    | n/a                |
|                           |        | (c) Explain how missing data were addressed                                                                                                                                                                                                                                                                                                                                                                                                                            | Page 10            |
|                           |        | (d) <i>Cohort study</i> —If applicable, explain how loss to follow-up was addressed<br><i>Case-control study</i> —If applicable, explain how matching of cases and controls was addressed                                                                                                                                                                                                                                                                              | n/a                |



|                          |     |                                                                                                                                                                                                              |                           |
|--------------------------|-----|--------------------------------------------------------------------------------------------------------------------------------------------------------------------------------------------------------------|---------------------------|
|                          |     | <i>Cross-sectional study</i> —If applicable, describe analytical methods taking account of sampling strategy                                                                                                 |                           |
|                          |     | (e) Describe any sensitivity analyses                                                                                                                                                                        | none                      |
| <b>Results</b>           |     |                                                                                                                                                                                                              |                           |
| Participants             | 13* | (a) Report numbers of individuals at each stage of study—eg numbers potentially eligible, examined for eligibility, confirmed eligible, included in the study, completing follow-up, and analysed            | Flow chart figure page 11 |
|                          |     | (b) Give reasons for non-participation at each stage                                                                                                                                                         |                           |
|                          |     | (c) Consider use of a flow diagram                                                                                                                                                                           | Figure 1                  |
| Descriptive data         | 14* | (a) Give characteristics of study participants (eg demographic, clinical, social) and information on exposures and potential confounders                                                                     | Page 11                   |
|                          |     | (b) Indicate number of participants with missing data for each variable of interest                                                                                                                          | Page 10                   |
|                          |     | (c) <i>Cohort study</i> —Summarise follow-up time (eg, average and total amount)                                                                                                                             |                           |
| Outcome data             | 15* | <i>Cohort study</i> —Report numbers of outcome events or summary measures over time                                                                                                                          |                           |
|                          |     | <i>Case-control study</i> —Report numbers in each exposure category, or summary measures of exposure                                                                                                         | Page 11-13                |
|                          |     | <i>Cross-sectional study</i> —Report numbers of outcome events or summary measures                                                                                                                           |                           |
| Main results             | 16  | (a) Give unadjusted estimates and, if applicable, confounder-adjusted estimates and their precision (eg, 95% confidence interval). Make clear which confounders were adjusted for and why they were included | Page 12-13                |
|                          |     | (b) Report category boundaries when continuous variables were categorized                                                                                                                                    |                           |
|                          |     | (c) If relevant, consider translating estimates of relative risk into absolute risk for a meaningful time period                                                                                             |                           |
| Other analyses           | 17  | Report other analyses done—eg analyses of subgroups and interactions, and sensitivity analyses                                                                                                               |                           |
| <b>Discussion</b>        |     |                                                                                                                                                                                                              |                           |
| Key results              | 18  | Summarise key results with reference to study objectives                                                                                                                                                     | Page 14                   |
| Limitations              | 19  | Discuss limitations of the study, taking into account sources of potential bias or imprecision. Discuss both direction and magnitude of any potential bias                                                   | Page 14-16                |
| Interpretation           | 20  | Give a cautious overall interpretation of results considering objectives, limitations, multiplicity of analyses, results from similar studies, and other relevant evidence                                   | Page 14-16                |
| Generalisability         | 21  | Discuss the generalisability (external validity) of the study results                                                                                                                                        | Page 17                   |
| <b>Other information</b> |     |                                                                                                                                                                                                              |                           |
| Funding                  | 22  | Give the source of funding and the role of the funders for the present study and, if applicable, for the original study on which the present article is based                                                | Page 22                   |

\*Give information separately for cases and controls in case-control studies and, if applicable, for exposed and unexposed groups in cohort and cross-sectional studies.

**Note:** An Explanation and Elaboration article discusses each checklist item and gives methodological background and published examples of transparent reporting. The STROBE checklist is best used in conjunction with this article (freely available on the Web sites of PLoS Medicine at <http://www.plosmedicine.org/>, Annals of Internal Medicine at <http://www.annals.org/>, and Epidemiology at <http://www.epidem.com/>). Information on the STROBE Initiative is available at [www.strobe-statement.org](http://www.strobe-statement.org).
